# Supplementary material for: Incorporation of an invasive plant into a native insect herbivore food web
Source: PeerJ. 2016 May 10;4:e1954. doi: 10.7717/peerj.1954 (PMC4867706; doi:10.7717/peerj.1954)
Supplement: Table S4 [file peerj-04-1954-s006.xlsx]

## Sheet: calculations.csv
SNP data
individual code	locus ([contig number]_[nucleotide position]) and genotype
	11794312_282	12318779_227	21984922_314	2953905_247	31592634_208	34263761_236	36358176_429	39621136_662	42676928_277	42777133_1393	4399895_342	45605527_288	50294453_211	5111714_358	52768033_1047	53526727_274	54299613_250	55830718_972	57036213_966	57173843_228	63910578_367	72138341_324	72147874_236	72148209_459	72154187_246	72155723_389	72170063_317	72205489_446	72216976_1319	72221526_703	72222412_222	72225380_190	72225466_293	72225870_593	72232347_290	72232713_434	72240240_250	72240532_350	72241466_731	72253142_689	72258291_499	72258648_292	72260290_819	72263418_218	72268046_611	72268332_496	72269394_292	72281920_528	72290781_320
AS-3-5B	C:C	T:A	G:G	G:G	G:G	T:G	T:T	G:A	C:C	A:A	C:A	G:G	C:A	T:C	T:T	A:A	A:A	G:G	A:A	A:A	G:A	A:A	A:A	T:C	T:C	G:G	T:C	A:A	C:C	G:G	G:G	C:C	T:G	A:A	A:A	C:C	G:G	G:A	C:C	G:A	T:T	G:G	G:G	C:C	G:C	T:T	C:C	G:G	T:T
AS-3-5C	C:C	T:A	G:G	G:G	C:C	T:G	T:T	G:A	C:C	C:A	A:A	?	C:C	T:T	T:T	A:A	A:A	G:A	G:A	A:A	G:G	C:C	G:A	T:T	T:T	T:T	C:C	A:A	C:C	A:A	G:G	T:C	G:G	T:A	A:A	C:C	G:G	G:G	T:C	G:G	T:T	G:G	G:A	G:C	G:G	T:C	C:C	A:A	T:T
AS-3-5D	T:C	T:A	C:C	G:G	G:C	T:G	T:T	G:A	?	C:A	C:C	G:G	A:A	T:C	T:C	A:A	A:A	A:A	G:A	G:A	G:A	C:C	G:A	T:T	T:T	G:G	T:C	G:A	C:C	G:G	G:G	T:C	G:G	T:A	A:A	T:C	G:A	G:G	C:C	G:G	T:T	G:G	G:A	G:C	G:C	T:T	C:C	A:A	T:T
AS-3-5E	C:C	T:A	G:G	G:G	G:G	G:G	T:T	G:A	C:C	A:A	C:A	G:G	C:A	T:C	T:T	A:A	A:A	A:A	G:G	A:A	G:A	C:A	G:G	T:T	T:C	T:G	T:C	G:A	C:C	G:A	G:G	T:C	T:T	T:A	A:A	T:C	A:A	G:A	C:C	A:A	?	G:G	A:A	C:C	G:C	T:T	G:C	G:A	T:T
AS-3-5F	T:C	?	G:G	G:G	G:C	G:G	T:T	G:G	G:C	C:A	C:A	T:G	A:A	T:C	T:C	A:A	A:A	A:A	G:G	A:A	G:G	C:A	G:G	T:T	T:T	T:G	C:C	A:A	C:C	A:A	G:G	T:T	T:T	T:T	A:A	C:C	A:A	?	T:C	G:A	T:T	G:G	G:G	C:C	G:G	T:T	C:C	A:A	T:T
AS-3-5G	?	T:T	G:G	T:G	C:C	G:G	T:T	A:A	C:C	C:A	?	?	?	T:T	T:C	T:A	G:A	G:A	?	?	?	?	A:A	?	?	G:G	C:C	A:A	C:C	G:A	G:G	C:C	T:G	?	?	?	?	?	?	?	?	G:G	G:A	C:C	G:G	C:C	?	?	?
AS-3-5H	C:C	T:A	G:G	G:G	C:C	G:G	T:G	G:A	C:C	C:C	A:A	G:G	A:A	T:C	T:C	A:A	A:A	G:A	G:G	A:A	G:G	C:A	A:A	C:C	T:T	G:G	C:C	G:A	C:C	G:G	G:G	T:T	T:T	T:T	A:A	T:C	G:A	G:G	C:C	G:A	T:A	G:G	G:G	G:C	G:G	T:T	C:C	A:A	T:T
AS-3-6A	T:C	T:A	G:G	T:T	C:C	G:G	T:T	G:A	?	A:A	C:C	G:G	C:A	T:T	T:C	A:A	G:G	G:A	G:A	A:A	G:G	C:A	G:A	T:C	T:C	T:G	C:C	A:A	C:C	G:A	G:G	C:C	T:G	A:A	A:A	T:C	G:G	G:G	C:C	A:A	T:A	G:G	G:A	G:C	G:G	T:T	C:C	G:A	T:T
AS-3-6B	C:C	A:A	G:C	G:G	G:C	G:G	T:T	G:G	G:G	C:A	C:A	G:G	A:A	T:C	T:C	A:A	A:A	G:A	G:A	A:A	?	C:A	A:A	C:C	T:T	T:G	T:C	A:A	C:C	G:G	G:G	T:C	T:T	T:A	A:A	T:C	A:A	G:G	C:C	A:A	T:T	G:G	G:G	G:C	G:C	T:T	C:C	A:A	T:T
AS-3-6C	C:C	T:A	G:G	T:G	G:C	T:G	T:T	G:G	C:C	C:A	C:A	G:G	C:C	T:T	T:C	A:A	G:A	A:A	G:A	A:A	G:A	C:C	A:A	T:C	T:C	T:T	T:C	A:A	C:C	A:A	G:G	T:T	?	T:T	A:A	T:C	G:A	G:A	C:C	A:A	T:A	G:G	A:A	G:C	G:C	T:C	G:C	A:A	T:T
AS-3-6D	C:C	?	G:G	G:G	G:G	G:G	T:G	G:A	?	A:A	C:A	G:G	C:C	T:C	T:T	A:A	A:A	A:A	G:A	A:A	G:A	C:C	G:A	T:C	T:T	T:G	?	A:A	C:C	A:A	G:G	T:C	T:T	T:A	A:A	C:C	G:A	?	T:C	A:A	T:T	G:G	G:A	G:G	G:C	T:C	G:C	A:A	T:T
AS-3-6E	C:C	T:T	G:G	T:T	C:C	G:G	T:T	A:A	C:C	C:A	A:A	G:G	A:A	T:T	T:C	A:A	G:A	G:G	G:G	G:A	G:G	A:A	A:A	T:T	T:T	G:G	C:C	G:A	C:C	G:A	G:G	T:T	T:T	T:T	A:A	T:C	G:G	?	C:C	A:A	?	G:C	G:G	G:C	G:G	T:T	G:C	A:A	T:T
AS-3-6F	C:C	A:A	G:G	G:G	G:C	G:G	T:T	G:A	G:G	A:A	A:A	T:G	C:A	T:T	T:T	A:A	A:A	G:G	G:A	A:A	G:G	A:A	A:A	T:T	T:T	G:G	C:C	G:A	C:C	G:G	G:G	T:T	T:T	T:T	A:A	T:T	G:A	G:A	T:C	?	?	G:G	G:A	C:C	G:G	T:T	C:C	G:G	T:T
AS-3-6G	T:C	T:A	G:G	T:G	G:C	T:G	T:T	G:A	G:C	C:A	C:C	T:T	C:C	T:C	T:C	A:A	G:A	G:G	G:G	G:A	G:G	C:A	G:A	T:T	T:T	T:G	C:C	G:A	C:C	A:A	G:G	T:C	T:G	T:T	A:A	C:C	A:A	G:A	C:C	A:A	T:T	G:G	G:A	C:C	G:G	T:C	C:C	G:A	T:T
AS-3-6H	C:C	T:T	G:C	T:G	C:C	G:G	T:T	G:G	C:C	C:A	A:A	G:G	A:A	T:T	T:T	A:A	A:A	G:G	G:G	G:A	G:G	A:A	A:A	T:T	T:T	G:G	C:C	G:G	C:C	G:A	G:G	T:T	T:T	T:T	A:A	T:T	G:G	G:A	C:C	A:A	A:A	G:C	G:G	C:C	G:G	T:T	G:C	A:A	T:T
AS-3-7A	C:C	A:A	G:G	T:G	G:C	G:G	T:T	G:A	C:C	A:A	C:C	G:G	C:A	T:C	T:C	A:A	G:A	A:A	G:G	A:A	G:A	A:A	G:A	T:T	T:C	T:G	T:C	A:A	C:C	A:A	G:G	T:T	T:G	T:T	A:A	C:C	G:G	G:G	T:T	A:A	T:A	G:G	G:G	G:C	G:C	T:T	C:C	G:A	T:A
AS-3-7B	C:C	?	G:C	T:T	C:C	G:G	T:T	G:G	C:C	C:A	A:A	G:G	A:A	T:T	T:C	A:A	G:G	G:A	G:G	G:A	G:A	A:A	G:A	T:T	T:C	G:G	?	G:A	C:C	G:A	T:T	T:T	T:T	T:T	A:A	T:C	G:G	G:A	C:C	A:A	T:A	G:C	G:G	C:C	G:C	T:T	G:G	?	T:T
AS-3-7C	C:C	T:A	G:C	G:G	G:C	G:G	T:T	A:A	C:C	A:A	A:A	T:G	A:A	T:T	T:C	A:A	A:A	A:A	G:A	A:A	G:A	C:A	A:A	T:T	T:T	T:T	T:C	G:A	C:C	G:A	G:G	T:C	?	T:A	A:A	C:C	G:A	G:G	T:C	G:A	T:T	G:G	A:A	C:C	G:C	T:C	G:C	A:A	T:T
AS-3-7D	T:C	T:A	G:G	T:G	G:C	G:G	T:T	G:G	C:C	A:A	A:A	G:G	A:A	T:T	T:C	A:A	G:A	A:A	G:A	G:A	G:A	C:C	A:A	T:T	T:T	T:G	T:C	G:A	C:C	A:A	G:G	T:T	T:T	T:T	A:A	T:T	G:A	G:G	C:C	A:A	T:A	G:G	G:A	C:C	G:C	T:T	C:C	A:A	T:T
KS-1-10A	C:C	A:A	G:G	G:G	C:C	G:G	T:T	G:G	C:C	C:A	C:C	G:G	A:A	T:T	T:C	A:A	A:A	A:A	A:A	A:A	G:G	C:A	G:G	T:C	T:C	T:G	C:C	G:A	C:C	G:G	G:G	T:T	T:T	T:T	A:A	C:C	A:A	A:A	T:C	A:A	T:T	G:C	G:G	C:C	G:G	T:T	C:C	?	T:A
KS-1-10B	C:C	A:A	G:G	G:G	G:C	T:G	T:T	G:A	G:G	C:C	C:A	T:G	C:A	T:T	T:T	A:A	A:A	G:A	G:A	A:A	G:A	A:A	G:A	T:T	T:T	G:G	T:C	G:A	C:C	G:G	G:G	T:C	G:G	T:A	A:A	C:C	A:A	A:A	C:C	A:A	T:A	G:G	G:G	G:C	G:C	T:T	G:C	?	T:T
KS-1-10C	C:C	?	C:C	G:G	C:C	T:G	T:T	G:G	C:C	C:C	C:C	T:G	C:A	T:C	C:C	T:A	A:A	G:A	A:A	A:A	G:G	C:C	A:A	T:T	T:T	T:T	C:C	A:A	C:C	G:A	G:G	T:C	T:G	T:T	A:A	T:T	G:A	G:G	T:C	A:A	T:T	G:G	G:G	C:C	G:G	T:T	G:G	A:A	T:T
KS-1-10D	C:C	A:A	G:C	G:G	C:C	G:G	T:T	G:G	?	C:C	A:A	G:G	A:A	T:T	T:C	A:A	A:A	G:A	G:A	A:A	G:G	C:A	A:A	T:T	C:C	G:G	C:C	A:A	C:C	G:G	G:G	T:T	T:T	T:T	A:A	T:T	?	A:A	C:C	G:A	T:A	G:G	G:G	G:C	G:G	T:T	G:C	?	T:T
KS-1-10E	T:C	?	G:G	T:G	C:C	T:G	T:G	G:G	C:C	A:A	A:A	G:G	C:A	C:C	T:C	A:A	G:A	A:A	G:A	G:A	G:G	C:C	A:A	T:T	T:T	G:G	C:C	G:G	C:C	G:G	G:G	T:T	T:T	T:T	A:A	C:C	G:G	?	T:C	G:G	T:T	G:G	G:A	G:C	G:G	T:T	C:C	A:A	T:T
KS-1-10F	T:C	A:A	G:G	T:G	C:C	G:G	T:T	G:A	C:C	C:C	A:A	T:G	C:A	T:C	T:C	A:A	G:A	G:A	G:G	A:A	G:G	A:A	G:A	T:T	T:T	G:G	C:C	A:A	C:C	G:A	G:G	T:T	T:G	T:T	A:A	C:C	G:A	G:A	C:C	G:A	T:T	G:G	G:A	C:C	G:G	T:T	G:G	G:G	T:T
KS-1-10G	T:C	?	C:C	G:G	C:C	G:G	T:G	G:A	?	C:C	A:A	T:G	C:A	T:T	T:C	A:A	A:A	G:A	A:A	A:A	G:G	C:A	G:A	T:T	T:T	T:G	C:C	A:A	C:C	G:A	G:G	T:T	T:T	T:T	A:A	C:C	A:A	G:A	C:C	G:A	T:T	G:G	G:G	G:C	G:G	T:C	G:C	G:A	T:T
KS-1-10H	C:C	T:A	G:G	T:T	C:C	T:G	T:T	G:A	C:C	C:A	A:A	G:G	A:A	T:T	T:C	T:A	G:G	G:A	G:A	G:G	G:G	C:C	G:G	T:C	T:T	T:G	C:C	G:A	C:C	G:A	G:G	T:C	G:G	T:A	A:A	C:C	G:G	G:A	T:T	A:A	A:A	G:C	G:A	C:C	G:G	T:T	G:C	A:A	T:T
KS-1-11A	C:C	A:A	G:C	T:G	G:G	G:G	T:T	G:A	C:C	C:C	C:A	T:G	C:A	T:T	T:C	A:A	G:A	G:A	G:A	G:A	A:A	C:A	G:A	T:T	?	T:G	T:T	A:A	C:C	A:A	G:G	T:T	G:G	T:T	A:A	T:C	A:A	G:A	C:C	G:A	T:T	G:G	G:G	G:C	C:C	T:T	C:C	G:A	T:T
KS-1-11B	T:C	A:A	G:C	T:G	G:C	G:G	T:T	G:G	G:C	C:C	C:A	G:G	C:A	T:T	T:T	A:A	G:A	G:G	G:A	A:A	G:A	C:C	A:A	T:T	T:C	T:G	T:C	G:A	C:C	G:G	T:T	T:T	T:T	T:T	A:A	C:C	G:A	G:G	T:C	A:A	T:A	G:G	G:A	C:C	G:C	C:C	G:G	A:A	T:A
KS-1-11C	C:C	?	G:C	T:G	G:C	G:G	T:T	G:A	C:C	C:C	A:A	T:G	A:A	C:C	T:C	A:A	G:A	G:A	G:A	A:A	G:A	C:C	G:A	T:T	T:T	T:G	T:C	A:A	C:C	G:G	G:G	T:T	T:G	T:T	A:A	T:C	G:A	G:A	T:T	A:A	T:T	G:G	G:G	C:C	G:C	T:T	C:C	A:A	T:T
KS-1-11D	C:C	A:A	G:C	G:G	G:G	G:G	T:T	G:G	C:C	C:C	A:A	G:G	C:C	T:T	T:C	A:A	A:A	A:A	A:A	G:A	A:A	C:C	A:A	T:C	T:T	G:G	T:T	A:A	C:C	G:A	G:G	T:T	T:G	T:T	A:A	C:C	G:A	G:A	C:C	A:A	T:T	G:G	G:A	C:C	C:C	C:C	C:C	G:A	T:T
KS-1-11E	C:C	A:A	G:C	T:G	C:C	T:T	T:T	G:G	?	C:C	C:A	G:G	C:C	T:T	T:C	T:A	G:A	A:A	A:A	A:A	G:G	C:C	A:A	T:T	T:T	G:G	C:C	G:G	C:C	G:G	G:G	T:T	T:G	T:T	A:A	T:C	G:G	?	T:T	A:A	T:T	G:G	G:G	G:C	G:G	T:C	C:C	A:A	T:T
KS-1-11F	T:C	?	G:G	G:G	G:C	T:G	T:T	G:G	C:C	A:A	A:A	T:G	A:A	C:C	T:C	A:A	A:A	G:A	G:A	A:A	G:A	C:C	G:G	T:T	T:T	G:G	T:C	A:A	C:C	G:A	G:G	T:T	T:G	T:T	A:A	T:C	A:A	G:A	T:C	A:A	T:T	G:G	G:G	C:C	G:C	T:T	C:C	A:A	T:T
KS-1-11G	C:C	A:A	G:G	G:G	C:C	T:G	T:T	G:G	C:C	C:A	A:A	G:G	A:A	T:C	T:C	A:A	A:A	G:A	G:G	A:A	G:G	A:A	G:G	T:C	T:T	G:G	C:C	A:A	C:C	G:G	G:G	T:C	T:T	T:T	A:A	C:C	G:G	G:G	T:C	G:A	T:T	G:G	G:G	G:G	G:G	T:C	G:C	G:G	T:T
KS-1-11H	C:C	A:A	G:C	T:G	G:C	G:G	T:G	G:A	C:C	A:A	C:A	G:G	C:A	T:C	T:T	T:A	G:A	G:G	A:A	G:A	G:A	C:A	A:A	T:T	T:T	G:G	T:C	A:A	C:C	G:A	G:G	T:T	G:G	T:T	A:A	C:C	A:A	G:A	C:C	G:A	T:T	G:G	G:G	G:G	G:C	T:T	G:C	A:A	T:T
KS-1-12A	C:C	A:A	G:G	T:G	C:C	T:G	T:T	G:G	G:G	C:A	C:A	T:G	A:A	T:C	T:T	T:A	G:A	A:A	A:A	G:G	G:G	C:A	A:A	T:T	T:T	T:T	C:C	A:A	C:C	G:G	G:G	T:T	T:G	T:T	A:A	T:C	G:A	A:A	T:C	G:A	T:T	G:G	G:A	G:C	G:G	C:C	C:C	G:A	T:T
KS-1-12B	C:C	A:A	G:C	G:G	G:G	G:G	T:T	G:A	C:C	C:C	C:C	G:G	A:A	T:T	T:C	A:A	A:A	G:A	A:A	A:A	A:A	C:C	G:A	C:C	T:T	T:G	T:T	A:A	C:C	G:G	G:G	T:T	T:G	T:T	A:A	C:C	G:A	G:A	C:C	A:A	T:T	G:G	G:A	G:C	C:C	T:T	G:C	?	T:T
KS-1-12C	C:C	A:A	G:G	G:G	C:C	?	T:G	G:G	C:C	C:A	A:A	T:G	A:A	C:C	T:T	A:A	A:A	G:A	G:A	A:A	G:G	C:A	G:A	T:C	T:C	G:G	C:C	G:A	C:C	G:A	G:G	T:T	T:G	T:T	A:A	T:C	G:A	G:A	T:C	G:A	T:T	G:G	G:G	G:C	G:G	T:T	G:C	A:A	T:T
KS-1-12D	C:C	A:A	C:C	G:G	C:C	G:G	T:T	G:G	C:C	C:A	C:C	T:T	C:A	T:T	T:T	A:A	A:A	A:A	A:A	G:A	G:G	C:A	A:A	T:T	T:T	T:T	C:C	A:A	C:C	G:G	G:G	T:T	G:G	T:T	A:A	C:C	A:A	G:G	C:C	G:A	T:T	G:G	G:G	C:C	G:G	T:T	G:C	G:A	T:T
KS-1-12E	C:C	A:A	G:G	G:G	C:C	G:G	T:T	G:A	C:C	C:C	C:C	G:G	A:A	C:C	T:T	A:A	A:A	A:A	G:A	G:A	G:G	C:A	?	C:C	T:T	G:G	C:C	A:A	C:C	G:A	G:G	T:T	T:T	T:T	A:A	C:C	G:A	G:A	C:C	G:G	?	G:G	G:G	G:C	G:G	T:T	G:G	G:A	T:A
KS-1-12F	T:C	T:A	G:C	G:G	G:C	G:G	T:T	G:G	C:C	A:A	A:A	G:G	C:A	C:C	T:C	A:A	A:A	G:A	G:A	G:A	G:A	C:C	G:A	T:T	T:T	T:G	T:C	A:A	C:C	G:A	G:G	T:C	T:G	T:A	A:A	C:C	G:A	?	T:T	A:A	T:T	G:G	G:A	C:C	G:C	T:T	C:C	A:A	T:T
KS-1-12G	C:C	A:A	G:G	G:G	C:C	G:G	T:T	G:G	G:C	C:C	C:A	T:T	A:A	T:T	T:T	T:A	A:A	A:A	G:A	A:A	G:G	C:C	G:G	T:C	T:T	T:T	C:C	A:A	C:C	G:A	G:G	T:T	G:G	T:T	A:A	T:C	?	G:A	C:C	G:G	T:T	G:C	G:A	G:G	G:G	T:T	C:C	A:A	T:A
KS-1-9B	C:C	?	G:C	G:G	G:C	T:G	T:T	G:G	G:G	C:A	C:A	G:G	C:A	T:C	C:C	A:A	A:A	G:A	A:A	G:A	G:A	C:A	A:A	T:T	T:C	T:G	T:C	G:G	C:C	A:A	G:G	T:T	T:G	T:T	A:A	C:C	A:A	G:G	T:C	G:A	T:A	G:G	G:G	C:C	G:C	T:T	G:C	G:A	T:T
KS-1-9C	T:C	?	G:C	T:G	G:C	G:G	T:T	G:A	C:C	C:A	C:A	G:G	C:A	T:T	T:C	A:A	G:A	G:G	A:A	A:A	G:A	C:A	G:A	T:T	T:T	G:G	T:C	G:A	C:C	G:A	G:G	T:T	T:T	T:T	A:A	C:C	A:A	G:A	C:C	G:A	T:T	G:G	G:G	C:C	G:C	T:C	C:C	A:A	T:T
KS-1-9D	C:C	A:A	G:G	T:G	C:C	G:G	T:T	G:G	C:C	C:C	C:A	G:G	C:C	T:T	T:T	A:A	G:A	G:A	A:A	A:A	G:G	C:A	G:A	T:C	T:C	G:G	C:C	G:A	C:C	A:A	G:G	T:T	T:G	T:T	A:A	C:C	G:A	A:A	C:C	A:A	T:T	G:C	G:G	C:C	G:G	T:T	G:C	A:A	T:T
KS-1-9E	C:C	?	G:C	G:G	G:C	T:G	T:T	G:G	C:C	C:C	C:A	G:G	C:C	T:C	T:T	A:A	A:A	G:A	A:A	A:A	G:A	C:A	G:A	T:C	T:T	T:G	T:C	G:A	C:C	G:G	G:G	T:T	G:G	T:T	A:A	T:C	G:A	G:G	C:C	G:G	T:T	G:G	G:A	C:C	G:C	T:T	C:C	G:A	T:T
KS-1-9F	C:C	T:A	C:C	G:G	G:C	T:G	T:T	G:G	C:C	C:A	C:C	G:G	C:A	T:T	T:C	A:A	A:A	G:A	G:A	A:A	G:A	C:A	A:A	T:T	T:C	T:G	T:C	A:A	C:C	G:A	G:G	T:T	G:G	T:T	A:A	C:C	G:G	A:A	C:C	G:A	T:T	G:G	G:A	G:G	G:C	T:T	G:C	G:A	T:T
KS-1-9G	C:C	A:A	G:C	T:G	G:C	G:G	T:T	G:G	G:C	C:C	C:A	T:G	C:A	C:C	T:C	A:A	G:A	G:A	G:A	A:A	G:A	A:A	G:A	T:T	T:T	G:G	T:C	A:A	C:C	G:A	G:G	T:T	T:G	T:T	A:A	T:C	G:A	G:A	C:C	G:A	T:T	G:G	G:G	C:C	G:C	T:T	G:G	G:A	T:T
KS-1-9H	C:C	?	G:G	T:G	C:C	T:G	T:T	A:A	C:C	C:A	C:A	G:G	A:A	T:C	T:C	A:A	G:A	G:A	G:A	A:A	G:G	C:A	G:A	T:T	T:T	T:T	C:C	A:A	C:C	G:G	G:G	T:C	T:G	T:A	A:A	C:C	G:A	G:G	C:C	?	T:T	G:G	G:A	C:C	G:G	T:C	G:G	G:A	T:T
KS-2-1A	?	?	G:G	T:G	C:C	G:G	T:T	A:A	?	C:C	?	?	?	?	T:C	A:A	G:A	G:A	?	G:A	?	C:A	?	?	?	G:G	C:C	A:A	C:C	G:A	G:G	T:T	T:G	?	?	?	?	G:A	?	?	?	G:G	G:G	C:C	G:G	?	?	?	?
KS-2-1B	C:C	A:A	G:C	T:G	C:C	G:G	T:T	G:G	C:C	C:C	C:C	G:G	C:A	T:T	C:C	T:A	G:A	G:A	G:A	G:A	G:G	A:A	G:A	T:T	T:T	T:G	C:C	G:G	C:C	G:A	G:G	T:T	T:G	T:T	A:A	C:C	G:A	G:A	C:C	A:A	T:A	G:G	A:A	C:C	G:G	C:C	C:C	G:A	T:T
KS-2-1C	C:C	T:A	G:G	T:G	G:C	G:G	T:G	G:G	?	C:C	C:A	G:G	C:A	T:C	T:T	A:A	G:A	G:A	?	G:A	G:A	C:A	A:A	T:T	T:T	G:G	T:C	G:A	C:C	G:G	G:G	T:C	T:G	T:T	A:A	C:C	A:A	G:G	T:C	A:A	T:T	C:C	G:A	G:C	G:C	T:T	C:C	G:A	T:T
KS-2-1D	C:C	A:A	G:G	G:G	G:C	G:G	G:G	A:A	G:G	C:A	A:A	T:G	A:A	?	T:C	A:A	A:A	G:A	A:A	G:A	G:A	C:A	G:G	T:T	T:T	T:G	T:C	A:A	C:A	A:A	G:G	T:T	T:T	T:T	A:A	C:C	G:A	A:A	C:C	G:A	T:T	G:G	A:A	G:G	G:C	T:T	G:C	G:A	T:T
KS-2-1E	C:C	?	C:C	T:G	C:C	G:G	T:T	G:A	C:C	C:A	C:A	T:G	C:A	T:T	T:C	A:A	G:A	G:A	G:A	G:A	G:G	C:A	G:A	T:C	C:C	T:G	C:C	A:A	C:C	G:G	G:G	T:T	T:T	T:T	A:A	T:T	G:G	?	C:C	G:A	T:A	G:G	G:G	G:G	G:G	T:T	G:C	G:A	T:T
KS-2-1F	T:C	T:A	G:G	T:G	G:G	G:G	T:T	G:A	?	C:C	A:A	T:T	C:A	T:C	T:T	T:A	G:A	?	G:G	A:A	A:A	C:A	G:A	T:T	T:T	T:G	T:T	G:A	C:C	G:G	G:G	T:T	T:T	T:T	A:A	C:C	G:A	G:G	C:C	A:A	T:T	G:C	G:G	C:C	C:C	T:C	C:C	A:A	T:T
KS-2-1G	T:C	T:A	G:C	G:G	C:C	G:G	T:G	G:G	?	A:A	C:A	T:G	A:A	T:T	T:T	A:A	A:A	G:G	G:A	G:A	G:G	C:A	A:A	T:C	T:T	G:G	C:C	A:A	C:C	G:G	G:G	T:T	T:G	T:T	A:A	C:C	G:G	?	C:C	?	?	G:G	G:A	G:C	G:G	T:C	G:C	G:A	T:T
KS-2-1H	T:T	?	G:C	G:G	G:G	G:G	T:T	G:A	C:C	C:C	A:A	T:G	A:A	T:T	T:C	T:A	A:A	G:A	A:A	G:G	A:A	C:A	A:A	T:T	T:C	G:G	T:T	A:A	C:C	G:A	G:G	T:T	T:T	T:T	A:A	T:T	A:A	G:G	T:C	G:A	T:A	G:G	G:G	C:C	C:C	T:C	G:C	A:A	T:T
KS-2-2A	?	?	G:G	G:G	C:C	G:G	T:T	G:G	C:C	C:C	?	?	?	?	T:T	A:A	A:A	G:G	?	?	?	A:A	?	?	?	T:G	C:C	G:A	C:C	G:A	G:G	T:T	?	?	?	?	?	G:G	?	?	?	G:G	G:A	G:C	G:G	T:T	?	?	?
KS-2-2B	T:C	A:A	G:C	G:G	C:C	G:G	T:T	G:G	C:C	C:C	C:A	G:G	A:A	T:T	T:C	A:A	A:A	G:A	G:A	A:A	G:G	C:A	A:A	T:T	T:T	T:T	C:C	G:G	C:C	G:A	G:G	T:T	T:T	T:T	A:A	T:C	G:G	?	C:C	A:A	T:T	G:G	A:A	C:C	G:G	T:C	G:C	A:A	T:T
KS-2-2C	?	?	G:C	G:G	G:C	G:G	T:T	G:G	G:G	C:A	C:A	G:G	A:A	?	T:T	A:A	A:A	G:A	G:A	?	G:A	C:A	A:A	T:T	T:T	T:T	T:C	G:G	C:C	G:A	T:T	T:T	T:T	T:T	A:A	C:C	?	A:A	C:C	A:A	T:T	G:G	G:A	C:C	G:C	T:C	G:C	G:A	T:T
KS-2-2D	?	?	G:G	T:G	G:C	G:G	T:T	A:A	C:C	C:A	?	?	?	?	T:T	A:A	G:A	A:A	?	?	?	C:C	?	?	?	T:G	T:C	G:A	C:C	G:A	G:G	T:T	G:G	?	?	?	?	?	?	?	?	G:C	G:A	C:C	G:C	?	?	?	?
KS-2-2E	C:C	A:A	G:G	G:G	G:C	G:G	T:T	G:A	?	C:C	C:C	G:G	A:A	T:T	T:T	T:A	A:A	A:A	A:A	A:A	G:A	C:C	G:A	T:T	T:T	G:G	T:C	A:A	C:C	G:A	G:G	T:T	T:G	T:T	A:A	T:C	A:A	G:A	C:C	G:A	T:T	G:C	G:G	G:C	G:C	T:T	G:C	A:A	T:T
KS-2-2F	C:C	T:A	G:C	T:G	C:C	G:G	T:T	G:G	?	C:C	C:A	T:G	C:A	T:C	T:C	A:A	G:A	G:G	G:G	A:A	G:G	C:A	A:A	T:T	T:C	G:G	C:C	A:A	C:C	G:G	G:G	T:T	T:T	T:T	A:A	C:C	G:G	G:G	C:C	A:A	T:T	G:G	G:A	G:C	G:G	T:C	C:C	A:A	T:A
KS-2-2G	T:C	?	G:C	T:G	C:C	G:G	T:T	G:A	C:C	C:A	C:A	T:T	C:A	T:C	T:C	A:A	G:A	G:A	G:A	A:A	G:G	C:A	G:G	T:C	T:T	T:G	C:C	A:A	C:C	G:G	G:G	T:T	T:G	T:T	A:A	T:C	G:G	G:G	T:C	A:A	T:T	G:G	G:A	G:C	G:G	T:T	C:C	G:A	T:T
KS-2-2H	C:C	?	G:C	T:G	G:C	G:G	T:T	G:A	?	C:C	C:C	G:G	C:A	T:C	T:T	A:A	G:A	A:A	G:A	G:A	G:A	C:A	G:G	T:C	T:T	G:G	T:C	A:A	C:C	G:A	G:G	T:T	T:T	T:T	A:A	C:C	A:A	A:A	C:C	G:A	T:T	G:G	G:G	G:C	G:C	T:T	G:C	A:A	T:T
KS-2-3A	T:T	?	G:C	G:G	G:C	G:G	T:T	G:A	?	C:C	A:A	G:G	C:A	T:C	C:C	A:A	A:A	G:A	G:A	A:A	G:A	C:C	A:A	T:T	T:T	T:T	?	G:A	C:C	G:G	T:T	T:T	G:G	T:T	A:A	C:C	G:A	G:A	C:C	G:A	T:A	G:G	A:A	G:G	G:C	T:T	G:G	A:A	T:A
KS-2-3B	C:C	?	G:C	T:G	G:G	G:G	T:T	G:A	C:C	C:A	A:A	G:G	A:A	T:T	T:T	A:A	G:A	G:A	A:A	G:A	A:A	C:A	G:A	T:C	T:C	G:G	T:T	G:A	C:C	G:A	G:G	T:T	T:T	T:T	A:A	T:C	G:A	G:G	T:T	A:A	T:A	G:C	G:G	C:C	C:C	T:C	G:C	G:A	T:T
KS-2-3C	C:C	T:A	G:C	G:G	C:C	G:G	T:T	G:G	C:C	C:A	A:A	G:G	C:A	T:C	T:C	A:A	A:A	G:A	A:A	A:A	G:G	C:C	G:G	T:T	T:C	T:G	C:C	G:A	C:C	G:A	G:G	T:C	T:G	T:T	A:A	T:T	A:A	?	T:C	G:A	T:A	G:C	A:A	C:C	G:G	T:T	C:C	G:A	T:T
KS-2-3D	C:C	A:A	G:C	G:G	G:G	G:G	T:T	G:G	?	C:A	A:A	G:G	A:A	T:T	T:T	A:A	A:A	G:A	A:A	A:A	A:A	C:C	G:G	T:T	T:T	G:G	T:T	A:A	C:C	A:A	G:G	T:C	T:T	T:A	A:A	C:C	G:G	G:G	C:C	G:A	T:T	G:C	G:G	C:C	C:C	T:C	C:C	A:A	T:T
KS-2-3E	C:C	?	G:G	T:G	G:C	T:G	T:T	G:A	G:G	C:C	A:A	G:G	A:A	T:T	T:T	A:A	G:A	A:A	G:A	G:A	G:A	C:C	A:A	T:T	T:C	G:G	T:C	G:A	C:C	G:A	G:G	T:T	T:G	T:T	A:A	T:C	G:A	G:A	C:C	G:A	T:T	G:G	G:G	C:C	G:C	T:C	C:C	A:A	T:T
KS-2-3F	C:C	?	C:C	G:G	C:C	T:T	T:T	G:G	?	C:C	A:A	G:G	C:C	T:C	T:T	A:A	A:A	G:A	A:A	A:A	G:G	C:C	A:A	T:T	T:T	T:G	C:C	G:G	C:C	G:G	G:G	T:T	T:G	T:T	A:A	T:C	G:G	G:G	T:T	A:A	T:T	G:G	G:A	G:C	G:G	T:T	C:C	A:A	T:T
KS-2-3G	T:C	T:A	G:C	T:G	G:C	G:G	T:T	G:G	C:C	C:A	A:A	T:G	C:A	C:C	C:C	A:A	G:A	A:A	G:A	A:A	G:A	C:A	G:A	T:T	T:T	T:G	T:C	A:A	C:C	A:A	G:G	T:T	T:G	T:T	A:A	T:C	A:A	?	T:T	A:A	T:T	G:G	G:G	C:C	G:C	T:T	C:C	A:A	T:A
KS-2-3H	C:C	?	C:C	T:G	C:C	G:G	T:T	A:A	C:C	C:C	C:A	T:G	C:A	T:T	T:C	A:A	G:A	G:G	G:A	A:A	G:G	C:A	A:A	T:T	T:C	T:G	C:C	G:G	C:C	G:A	G:G	T:C	T:T	T:T	A:A	T:T	G:G	A:A	T:C	G:A	T:T	G:G	G:G	G:C	G:G	T:T	G:C	G:A	T:T
N2S-1-4E	C:C	?	G:G	T:T	G:C	G:G	T:T	A:A	C:C	C:A	A:A	G:G	A:A	C:C	T:T	A:A	G:A	G:A	G:A	G:A	G:A	C:A	A:A	T:T	T:T	G:G	T:C	A:A	C:C	G:A	G:G	T:C	T:T	T:A	A:A	C:C	G:A	?	?	G:A	T:A	G:G	G:G	G:C	G:C	T:T	C:C	G:A	T:T
N2S-1-4F	C:C	T:A	G:C	G:G	C:C	G:G	T:T	G:A	C:C	C:A	C:C	T:T	C:A	T:T	T:T	A:A	A:A	G:A	A:A	G:A	G:G	C:C	A:A	T:T	T:T	G:G	C:C	A:A	C:C	A:A	G:G	T:T	T:G	T:T	A:A	T:T	G:G	G:A	C:C	A:A	T:T	G:G	G:A	C:C	G:G	T:T	C:C	A:A	T:T
N2S-1-4G	?	?	C:C	G:G	C:C	T:G	T:T	G:G	C:C	C:A	C:A	?	?	?	C:C	A:A	A:A	G:G	?	?	?	C:C	?	?	?	T:T	C:C	G:A	C:C	G:A	G:G	T:T	T:T	?	?	?	?	?	?	?	?	G:G	A:A	G:G	G:G	?	?	?	?
N2S-1-4H	T:C	T:A	C:C	T:G	C:C	T:G	T:G	G:G	C:C	C:A	A:A	T:G	A:A	T:T	T:C	A:A	G:A	A:A	G:A	A:A	G:G	A:A	A:A	T:T	T:T	T:T	C:C	A:A	C:C	G:A	T:T	T:T	T:T	T:T	A:A	T:C	G:A	?	T:C	G:A	T:A	G:G	G:G	C:C	G:G	T:T	C:C	G:G	T:T
N2S-1-5A	T:C	A:A	G:G	G:G	C:C	G:G	T:T	A:A	C:C	C:C	A:A	T:G	C:A	T:T	T:T	A:A	A:A	G:A	G:A	A:A	G:G	C:C	G:A	T:T	T:C	T:T	C:C	A:A	C:C	G:A	G:G	T:T	G:G	T:T	A:A	C:C	G:A	A:A	C:C	G:A	T:T	G:G	G:A	C:C	G:G	T:T	G:C	A:A	T:T
N2S-1-5B	T:C	T:A	G:G	G:G	C:C	G:G	T:T	G:A	C:C	C:A	C:A	G:G	C:C	T:C	T:T	A:A	A:A	G:G	A:A	A:A	G:G	C:A	A:A	T:C	T:T	T:G	C:C	A:A	C:C	G:G	G:G	T:C	T:T	T:T	A:A	T:T	G:A	G:A	C:C	A:A	T:T	G:G	G:G	G:C	G:G	T:T	C:C	G:A	T:T
N2S-1-5C	T:C	T:T	G:C	T:G	C:C	G:G	T:T	G:A	C:C	C:A	C:C	T:T	A:A	T:T	T:C	A:A	G:A	G:A	G:A	A:A	G:G	A:A	G:G	T:T	T:T	T:G	C:C	A:A	C:C	G:A	G:G	T:T	G:G	T:T	A:A	T:C	G:A	G:G	C:C	G:A	T:T	G:G	G:A	G:C	G:G	T:T	C:C	G:G	T:A
N2S-1-5D	T:T	T:A	G:G	T:G	G:C	G:G	T:T	G:G	C:C	C:A	C:A	T:G	A:A	T:T	T:T	A:A	G:A	A:A	A:A	A:A	G:A	C:C	G:A	T:T	T:T	T:T	T:C	A:A	C:C	G:A	G:G	T:C	T:T	T:A	A:A	T:C	?	A:A	C:C	G:A	T:T	G:G	G:A	G:C	G:C	T:T	G:C	A:A	T:T
N2S-1-5E	T:C	A:A	G:C	T:G	G:C	G:G	T:T	G:A	C:C	C:A	C:C	G:G	C:A	T:C	T:C	A:A	G:A	G:A	G:A	G:A	G:A	C:A	G:G	T:C	T:C	G:G	T:C	A:A	C:C	A:A	G:G	T:C	T:T	T:A	A:A	C:C	A:A	?	C:C	A:A	T:T	G:G	G:G	C:C	G:C	T:T	C:C	G:A	T:T
N2S-1-5F	C:C	T:T	C:C	T:G	G:C	G:G	T:T	G:A	C:C	C:A	A:A	G:G	C:C	T:T	T:C	A:A	G:A	G:A	A:A	A:A	G:A	A:A	G:A	T:T	T:T	T:T	T:C	A:A	C:C	G:A	G:G	T:T	G:G	T:T	A:A	C:C	A:A	?	C:C	A:A	T:T	G:C	G:A	G:C	G:C	T:C	G:G	G:A	T:T
N2S-1-5G	T:C	?	G:C	G:G	C:C	T:G	T:T	G:A	G:G	A:A	C:A	G:G	A:A	T:C	T:C	A:A	A:A	G:G	A:A	A:A	G:G	C:A	G:A	T:C	T:T	T:G	C:C	A:A	C:C	?	G:G	T:T	T:G	T:T	A:A	T:C	A:A	A:A	C:C	A:A	A:A	G:G	A:A	G:G	G:G	T:C	G:C	G:A	T:T
N2S-1-5H	C:C	A:A	G:C	G:G	G:C	G:G	T:G	G:A	C:C	C:A	A:A	T:G	A:A	T:C	T:C	A:A	A:A	G:A	A:A	A:A	G:A	C:C	G:G	T:C	T:T	T:G	T:C	G:A	C:C	G:G	G:G	T:C	T:T	T:T	A:A	T:C	G:A	G:A	C:C	A:A	T:T	G:G	G:G	C:C	G:C	T:T	C:C	A:A	T:T
N2S-1-6A	T:C	A:A	G:C	G:G	G:G	G:G	T:T	G:G	C:C	C:C	A:A	G:G	A:A	T:T	T:C	A:A	A:A	G:G	A:A	G:A	A:A	C:A	G:A	T:T	T:T	T:G	T:T	A:A	C:C	G:G	G:G	T:C	T:T	T:A	A:A	T:C	A:A	G:A	C:C	A:A	T:T	G:G	G:A	C:C	C:C	T:T	G:G	G:A	T:T
N2S-1-6B	T:C	?	G:G	G:G	C:C	G:G	T:T	G:A	C:C	C:A	C:A	T:G	C:A	T:T	T:C	A:A	A:A	G:A	G:A	G:A	G:G	C:C	G:A	T:T	T:C	T:T	C:C	G:A	C:C	G:G	G:G	T:T	T:G	T:T	A:A	T:T	A:A	A:A	C:C	A:A	T:T	G:G	G:A	C:C	G:G	T:T	G:G	G:A	T:T
N2S-1-6C	C:C	T:A	G:G	T:G	C:C	G:G	T:G	G:G	C:C	C:C	C:A	G:G	C:A	T:T	T:T	A:A	G:A	G:A	A:A	A:A	G:G	A:A	A:A	T:C	T:C	T:G	C:C	A:A	C:C	G:A	G:G	T:T	T:T	T:T	A:A	C:C	G:A	G:A	C:C	A:A	T:A	G:G	G:A	C:C	G:G	T:T	C:C	G:G	T:T
N2S-1-6D	C:C	?	G:C	G:G	G:C	G:G	T:T	G:G	G:G	A:A	C:C	G:G	C:A	T:T	T:T	A:A	A:A	?	A:A	G:A	G:A	C:A	A:A	T:T	T:T	G:G	T:C	A:A	C:C	G:A	G:G	T:T	T:T	T:T	A:A	T:C	A:A	A:A	C:C	G:A	T:T	G:G	G:G	G:C	G:C	T:T	C:C	A:A	T:T
N2S-1-6E	C:C	?	G:G	T:G	C:C	G:G	T:T	G:A	C:C	C:C	C:A	G:G	C:A	T:T	T:T	A:A	G:A	G:G	G:A	A:A	G:G	A:A	G:A	T:T	T:T	G:G	C:C	G:A	C:C	G:A	G:G	T:T	T:T	T:T	A:A	T:C	G:G	?	C:C	G:A	T:T	G:C	G:G	C:C	G:G	T:T	G:C	G:G	T:T
N2S-1-6F	T:C	A:A	G:C	T:G	C:C	T:G	T:T	G:G	C:C	C:A	A:A	G:G	C:C	T:C	C:C	A:A	G:A	G:A	A:A	G:A	G:G	C:A	G:A	T:T	T:T	G:G	C:C	A:A	C:C	G:G	G:G	T:T	T:T	T:T	A:A	T:C	G:G	G:A	C:C	G:A	T:T	G:C	G:A	C:C	G:G	T:T	C:C	G:A	T:T
N2S-1-6G	T:C	?	G:C	T:G	G:C	T:G	T:T	G:G	C:C	A:A	C:C	G:G	C:C	T:C	C:C	A:A	G:A	A:A	A:A	A:A	G:A	C:A	G:A	T:T	T:T	G:G	T:C	A:A	C:C	G:A	G:G	T:C	G:G	T:T	A:A	T:C	G:G	?	C:C	A:A	T:T	G:C	G:A	C:C	G:C	C:C	C:C	G:A	T:T
N2S-1-6H	T:C	T:A	G:G	T:G	C:C	G:G	T:T	G:G	C:C	A:A	C:A	G:G	C:A	T:C	T:C	A:A	G:A	A:A	A:A	A:A	G:G	C:A	G:A	T:T	T:T	T:G	C:C	A:A	C:C	G:G	G:G	T:T	T:G	T:T	A:A	C:C	A:A	?	C:C	G:A	T:T	C:C	G:A	C:C	G:G	T:T	C:C	G:A	T:T
N2S-1-7A	T:C	T:T	G:G	G:G	C:C	G:G	T:T	G:A	C:C	C:A	A:A	G:G	C:A	T:T	T:T	?	A:A	G:A	G:A	G:A	G:G	C:C	G:A	T:T	?	T:G	C:C	A:A	C:C	G:G	G:G	T:T	T:T	T:T	A:A	T:C	?	A:A	T:C	G:A	T:A	G:G	A:A	C:C	G:G	T:T	G:G	A:A	T:T
N2S-1-7B	T:T	A:A	G:C	G:G	G:C	G:G	T:T	G:G	?	C:A	A:A	G:G	C:C	T:C	T:T	A:A	A:A	G:A	A:A	G:A	G:A	A:A	G:A	T:T	T:T	G:G	T:C	A:A	C:C	G:A	G:G	T:C	T:T	T:T	A:A	C:C	G:A	G:A	T:T	G:A	T:T	G:G	G:G	C:C	G:C	T:T	C:C	G:A	T:T
N2S-1-7C	T:C	T:A	G:G	T:T	G:C	G:G	T:T	G:A	?	C:A	C:C	T:G	A:A	T:T	T:T	A:A	G:G	G:A	G:A	G:A	G:A	C:A	G:A	T:T	T:C	T:T	T:C	G:A	C:C	G:A	G:G	T:C	T:T	T:T	A:A	C:C	A:A	G:A	C:C	G:A	T:T	G:G	G:A	G:C	G:C	T:C	G:C	G:A	T:T
N2S-1-7D	C:C	?	G:G	G:G	C:C	G:G	T:T	G:G	C:C	C:A	A:A	G:G	C:A	T:T	T:C	A:A	A:A	G:A	G:A	A:A	G:G	C:A	A:A	T:C	T:T	G:G	C:C	G:A	C:C	G:G	G:G	T:T	T:G	T:T	A:A	C:C	G:A	?	C:C	A:A	T:A	G:G	G:A	C:C	G:G	T:C	C:C	G:A	T:T
N2S-1-7E	C:C	?	C:C	G:G	C:C	G:G	T:T	G:G	C:C	C:C	A:A	T:G	A:A	T:T	T:C	T:A	A:A	A:A	G:G	A:A	G:G	C:C	A:A	T:T	T:T	T:G	C:C	G:A	C:C	A:A	G:G	T:T	T:T	T:T	A:A	C:C	G:A	G:G	C:C	G:A	T:T	G:G	G:A	C:C	G:G	T:T	G:G	A:A	T:T
N2S-1-7F	C:C	T:A	G:G	T:G	C:C	G:G	T:T	G:A	C:C	A:A	C:A	G:G	C:A	T:T	C:C	A:A	G:A	G:A	A:A	A:A	G:G	C:C	A:A	T:C	T:T	G:G	C:C	A:A	C:C	G:A	G:G	T:T	T:T	T:T	A:A	C:C	A:A	G:A	C:C	A:A	T:T	G:G	G:G	C:C	G:G	T:C	G:C	A:A	T:T
N2S-1-7G	T:T	T:A	G:C	T:G	C:C	G:G	T:T	G:G	C:C	C:C	C:C	G:G	C:C	T:T	T:T	A:A	G:A	G:A	G:A	A:A	G:G	C:A	A:A	T:T	T:T	T:G	C:C	A:A	C:C	G:G	G:G	T:T	T:T	T:T	A:A	T:C	G:G	G:G	T:C	G:A	T:T	G:G	A:A	G:G	G:G	C:C	G:C	?	T:T
N2S-1-7H	T:C	T:T	G:G	T:G	C:C	?	T:T	G:G	C:C	C:A	?	?	?	?	T:T	A:A	G:A	A:A	?	?	?	?	?	?	?	G:G	C:C	G:A	C:C	G:G	G:G	T:T	G:G	?	?	?	?	?	?	?	T:T	G:G	G:G	G:C	G:G	?	?	?	?
N2S-1-8A	C:C	T:A	G:G	G:G	G:C	G:G	T:T	G:G	C:C	C:A	C:A	T:G	A:A	T:C	T:C	A:A	A:A	G:G	G:A	G:A	G:A	C:A	A:A	T:C	T:T	T:T	T:C	A:A	C:C	G:A	G:G	T:T	T:G	T:T	A:A	C:C	G:A	A:A	C:C	A:A	T:T	G:G	A:A	C:C	G:C	T:T	C:C	G:A	T:A
N2S-1-8B	C:C	A:A	G:G	G:G	C:C	G:G	T:T	G:G	C:C	C:C	C:A	T:G	C:A	T:T	T:T	A:A	A:A	G:G	A:A	A:A	G:G	A:A	G:A	T:C	T:T	G:G	C:C	G:A	C:C	G:G	G:G	T:T	T:G	T:T	A:A	T:C	G:G	G:A	C:C	A:A	T:A	G:G	G:G	C:C	G:G	T:T	C:C	G:A	T:A
N2S-1-8C	C:C	A:A	G:C	T:G	G:G	G:G	T:T	G:G	C:C	A:A	C:A	?	C:A	T:T	T:T	A:A	G:A	G:G	G:A	G:A	A:A	C:C	G:A	T:T	T:T	T:G	T:T	A:A	C:C	A:A	G:G	T:T	G:G	T:T	A:A	T:C	A:A	G:A	C:C	A:A	T:T	G:G	G:G	G:G	C:C	T:T	C:C	A:A	T:T
N2S-1-8D	C:C	?	G:C	G:G	C:C	G:G	T:T	G:G	?	C:A	A:A	T:G	C:C	T:C	T:C	A:A	A:A	G:A	A:A	G:G	G:G	C:C	G:A	T:C	T:T	G:G	C:C	G:A	C:C	G:A	G:G	T:T	T:T	T:T	A:A	T:T	G:A	G:A	C:C	A:A	T:T	G:G	G:A	G:C	G:G	?	G:C	A:A	T:T
N2S-1-8E	T:C	?	G:G	G:G	G:G	G:G	T:T	G:A	C:C	C:C	A:A	G:G	C:A	T:C	C:C	A:A	A:A	G:G	A:A	A:A	A:A	C:A	G:G	T:T	T:T	T:T	T:T	A:A	C:C	G:A	G:G	T:T	T:G	T:T	A:A	C:C	G:A	G:G	T:C	G:A	T:T	G:G	G:G	C:C	C:C	T:C	G:C	G:A	T:T
N2S-1-8F	C:C	T:A	G:C	G:G	G:C	G:G	T:G	G:G	C:C	C:A	C:A	T:G	C:C	T:C	T:C	A:A	A:A	A:A	A:A	G:A	G:A	C:C	G:A	T:T	T:T	T:G	T:C	A:A	C:C	G:A	G:G	T:T	T:T	T:T	A:A	T:C	A:A	G:A	C:C	?	T:T	G:G	G:A	C:C	G:C	T:C	C:C	A:A	T:T
N2S-1-8G	T:T	T:A	G:C	G:G	C:C	G:G	T:T	G:G	C:C	C:A	A:A	G:G	A:A	T:C	T:T	A:A	A:A	G:A	G:G	G:A	G:G	C:A	G:A	T:T	T:T	G:G	C:C	A:A	C:C	G:A	G:G	T:T	T:T	T:T	A:A	T:C	A:A	G:G	C:C	G:A	T:T	G:G	G:G	G:C	G:G	T:C	G:G	?	T:T
N2S-1-8H	T:C	?	G:G	T:G	G:C	T:G	T:T	G:G	C:C	A:A	C:A	G:G	C:A	T:T	C:C	A:A	G:A	A:A	A:A	G:A	G:A	C:C	G:A	T:T	T:T	G:G	T:C	A:A	C:C	G:G	G:G	T:C	T:T	T:T	A:A	T:T	A:A	G:G	C:C	G:A	T:T	G:C	G:A	G:C	G:C	T:T	G:C	G:A	T:T
N2S-1-9A	T:T	A:A	C:C	T:G	G:C	T:G	T:T	G:A	C:C	C:A	C:A	T:G	C:A	T:T	T:T	A:A	G:A	G:A	G:A	A:A	G:A	C:A	G:G	T:C	T:T	G:G	T:C	A:A	C:C	A:A	G:G	T:C	T:T	T:A	A:A	C:C	A:A	G:A	C:C	A:A	T:T	G:G	G:G	G:C	G:C	T:T	G:C	G:A	T:T
NLS-3-10A	C:C	A:A	G:G	G:G	G:C	G:G	T:T	G:G	C:C	C:A	A:A	?	A:A	C:C	T:C	T:A	A:A	A:A	G:A	?	G:A	C:A	A:A	T:C	T:T	T:G	?	G:A	C:C	?	G:G	T:T	G:G	T:T	A:A	C:C	?	G:G	T:C	G:A	T:A	G:G	A:A	C:C	G:C	T:T	C:C	?	T:T
NLS-3-10B	T:T	A:A	G:C	G:G	G:C	T:G	T:T	G:A	?	C:A	C:A	T:T	C:A	T:T	T:T	T:T	A:A	G:A	G:A	A:A	G:G	C:A	G:A	T:T	T:T	T:G	C:C	A:A	C:C	G:A	G:G	T:C	T:G	T:A	A:A	T:T	?	?	T:T	G:G	T:T	G:C	G:A	G:C	G:G	T:C	C:C	G:A	T:T
NLS-3-10C	T:C	A:A	G:C	T:G	G:G	G:G	T:T	G:G	C:C	C:A	C:A	G:G	C:A	T:C	T:T	T:A	G:A	A:A	G:A	G:G	A:A	A:A	A:A	C:C	C:C	G:G	T:T	G:A	C:C	G:A	G:G	T:T	G:G	T:T	A:A	T:C	G:A	A:A	T:C	G:A	T:T	G:G	G:A	G:C	C:C	T:T	G:C	G:A	T:T
NLS-3-10D	C:C	T:A	C:C	T:G	G:C	G:G	T:T	G:A	G:C	C:A	C:C	G:G	A:A	T:C	T:T	A:A	G:A	G:A	G:G	A:A	G:A	C:C	G:A	T:T	T:C	G:G	T:C	A:A	C:C	A:A	G:G	T:T	T:T	T:T	A:A	T:C	G:A	A:A	C:C	G:G	T:T	G:G	G:A	C:C	G:C	T:T	G:G	A:A	T:T
NLS-3-10E	C:C	A:A	G:C	G:G	G:C	G:G	T:T	G:G	C:C	C:C	A:A	G:G	A:A	C:C	T:C	T:A	A:A	G:A	G:A	G:A	G:A	A:A	G:G	C:C	T:C	T:G	T:C	G:A	C:C	A:A	G:G	T:T	G:G	T:T	A:A	T:C	G:A	G:G	C:C	G:G	T:T	G:G	G:G	G:C	G:C	T:C	G:C	G:G	T:T
NLS-3-10F	C:C	A:A	C:C	T:G	G:C	G:G	T:T	G:A	G:C	C:A	C:A	G:G	A:A	T:C	T:C	T:A	G:A	A:A	G:G	A:A	G:A	C:A	G:G	T:C	T:C	T:G	T:C	A:A	C:C	A:A	G:G	T:T	T:T	T:T	A:A	C:C	G:A	G:G	T:C	G:A	T:T	G:G	A:A	G:C	G:C	T:C	C:C	G:A	T:T
NLS-3-10G	C:C	T:A	G:G	T:G	G:G	G:G	T:T	G:G	G:C	C:A	C:A	G:G	A:A	T:C	T:C	T:A	G:A	G:A	G:A	A:A	A:A	C:A	G:A	T:C	T:T	T:T	T:T	A:A	C:C	G:A	G:G	T:C	T:T	T:T	A:A	T:T	G:A	?	C:C	G:G	T:T	G:G	G:G	G:C	C:C	T:C	G:C	A:A	T:T
NLS-3-10H	C:C	T:A	G:C	T:G	G:G	G:G	T:T	G:A	G:C	A:A	C:A	G:G	A:A	T:T	C:C	T:A	G:A	G:A	G:G	A:A	G:A	A:A	G:G	T:C	T:T	T:G	T:C	A:A	C:C	G:A	G:G	T:T	G:G	T:T	A:A	T:T	A:A	?	C:C	G:A	T:A	C:C	G:A	C:C	G:C	T:T	G:C	G:A	T:T
NLS-3-11A	C:C	?	G:C	T:G	G:C	G:G	T:T	G:A	C:C	C:C	C:A	G:G	C:A	T:T	C:C	T:A	G:A	G:A	G:A	G:A	G:A	C:A	G:A	T:C	T:C	G:G	T:C	A:A	C:C	G:G	T:T	?	T:G	T:T	A:A	T:C	G:A	A:A	T:C	G:A	T:A	G:G	G:G	G:C	G:C	T:T	G:C	G:A	T:T
NLS-3-11B	C:C	T:A	G:C	G:G	G:C	T:G	T:T	G:A	G:C	C:A	C:A	G:G	A:A	T:T	T:T	T:A	A:A	G:A	A:A	G:A	G:G	C:A	G:A	T:C	C:C	T:T	C:C	G:A	C:C	A:A	G:G	T:C	T:T	T:A	A:A	T:C	G:G	A:A	C:C	G:G	T:A	G:G	G:A	C:C	G:G	T:T	G:C	A:A	T:T
NLS-3-11C	C:C	A:A	G:C	G:G	G:C	G:G	T:T	G:A	C:C	C:A	A:A	T:T	C:A	T:C	T:T	A:A	A:A	A:A	G:A	G:A	G:A	A:A	A:A	C:C	T:T	T:G	T:C	A:A	C:C	G:A	G:G	T:T	G:G	T:T	A:A	T:C	G:A	?	T:C	A:A	T:T	G:G	G:A	G:G	G:C	T:T	G:C	G:G	T:T
NLS-3-11D	C:C	A:A	G:C	G:G	G:C	G:G	T:T	G:G	G:C	C:A	C:A	G:G	C:A	T:T	T:C	A:A	A:A	G:G	G:A	G:A	G:A	C:A	G:A	T:T	T:C	G:G	T:C	G:A	C:C	G:A	G:G	T:T	G:G	T:T	A:A	T:C	G:G	G:G	T:T	A:A	T:T	G:C	G:G	C:C	G:C	T:T	G:C	G:A	T:T
NLS-3-11E	C:C	A:A	C:C	T:G	G:G	G:G	T:T	G:G	C:C	C:C	C:A	T:T	C:A	T:C	T:T	A:A	G:A	G:A	G:A	A:A	A:A	C:A	A:A	T:C	T:T	G:G	T:T	G:A	C:C	G:A	G:G	T:T	T:G	T:T	A:A	T:C	G:A	A:A	C:C	A:A	T:A	G:G	G:A	G:C	C:C	T:C	C:C	A:A	T:T
NLS-3-11F	C:C	?	G:G	T:G	G:G	G:G	T:T	G:A	C:C	C:C	C:C	T:G	C:C	C:C	T:C	A:A	G:A	G:A	G:G	A:A	A:A	C:A	G:A	T:C	T:T	T:G	T:T	A:A	C:C	G:A	G:G	T:T	T:T	T:T	A:A	T:C	G:A	G:G	C:C	G:G	?	G:G	A:A	C:C	C:C	C:C	C:C	A:A	T:T
NLS-3-11G	T:T	A:A	G:G	G:G	G:C	G:G	T:T	G:A	C:C	C:C	C:A	T:G	C:A	T:C	T:T	T:A	A:A	G:A	A:A	A:A	G:G	C:A	G:A	T:C	T:T	G:G	C:C	G:G	C:C	G:A	G:G	T:C	T:T	T:A	A:A	C:C	G:A	G:A	C:C	A:A	T:A	G:G	G:A	C:C	G:G	C:C	G:C	G:A	T:T
NLS-3-11H	C:C	A:A	G:G	T:G	G:C	T:G	T:T	G:G	C:C	C:A	A:A	T:T	C:A	T:C	T:C	A:A	G:A	A:A	G:A	A:A	G:A	C:A	G:A	T:T	T:C	T:G	T:C	G:A	C:C	G:G	G:G	T:C	T:T	T:A	A:A	T:C	G:A	G:A	C:C	?	T:A	G:G	G:A	G:G	G:C	C:C	G:C	G:A	T:A
NLS-3-12A	T:C	A:A	C:C	G:G	G:C	G:G	T:T	G:A	C:C	C:A	A:A	T:G	C:A	T:C	T:T	A:A	A:A	G:A	G:A	A:A	G:A	C:C	G:A	T:T	C:C	G:G	T:C	A:A	C:C	G:A	T:T	T:T	T:G	T:T	A:A	C:C	G:A	G:A	C:C	A:A	T:T	G:G	G:A	G:G	G:C	T:T	C:C	A:A	T:T
NLS-3-12B	C:C	A:A	G:G	G:G	G:G	G:G	T:T	G:A	G:G	C:A	C:A	G:G	A:A	C:C	C:C	A:A	A:A	G:G	G:G	G:A	A:A	C:A	A:A	T:T	T:T	T:G	T:T	G:A	C:C	G:A	G:G	T:T	G:G	T:T	A:A	T:T	G:A	G:A	T:C	G:A	T:T	G:G	G:A	G:C	C:C	T:T	G:C	G:A	T:T
NLS-3-12C	C:C	T:T	G:G	T:G	C:C	T:G	T:T	G:G	G:C	A:A	C:A	T:G	C:A	T:C	T:T	T:A	G:A	A:A	A:A	G:G	G:G	C:A	G:A	T:C	T:C	G:G	C:C	G:G	C:C	G:A	G:G	T:T	G:G	T:T	A:A	T:C	G:G	A:A	T:C	G:G	T:A	G:G	G:A	C:C	G:G	T:C	G:C	G:A	T:T
NLS-3-12D	C:C	A:A	G:G	T:G	G:C	T:G	T:T	G:A	C:C	C:A	C:A	T:T	C:A	T:C	T:T	T:A	G:A	A:A	G:A	A:A	G:A	A:A	G:A	T:T	T:C	T:G	T:C	G:A	C:C	G:G	G:G	T:C	T:T	T:A	A:A	T:C	G:G	A:A	C:C	G:G	?	G:G	G:A	G:C	G:C	T:C	G:C	G:A	T:A
NLS-3-12E	C:C	T:T	G:C	G:G	C:C	G:G	T:T	G:G	C:C	C:A	C:A	T:G	C:C	T:T	T:T	T:A	A:A	A:A	G:G	A:A	G:G	C:A	G:A	T:T	T:T	G:G	C:C	G:A	C:C	A:A	G:G	T:T	T:G	T:T	A:A	C:C	A:A	G:G	T:C	A:A	A:A	G:G	G:A	C:C	G:G	T:T	G:C	G:A	T:T
NLS-3-12F	C:C	T:A	G:G	T:G	C:C	G:G	G:G	G:G	G:G	C:A	A:A	T:G	C:A	T:T	T:T	T:A	G:A	A:A	G:A	G:G	G:G	C:A	A:A	T:C	T:T	T:T	C:C	G:A	C:C	A:A	G:G	T:T	G:G	T:T	A:A	C:C	A:A	G:A	C:C	G:G	T:T	G:G	G:A	G:C	G:G	C:C	C:C	G:A	T:T
NLS-3-12G	C:C	?	C:C	G:G	G:G	G:G	T:T	A:A	G:G	C:A	C:A	G:G	A:A	T:C	T:C	T:A	A:A	G:G	G:A	A:A	A:A	A:A	G:A	T:C	?	G:G	T:T	A:A	C:C	G:A	G:G	T:C	T:T	T:A	A:A	T:T	A:A	A:A	C:C	G:A	T:A	G:G	G:G	G:C	C:C	T:T	C:C	G:A	T:T
NLS-3-7E	T:C	?	G:G	T:G	C:C	G:G	T:T	G:G	G:C	C:C	C:A	T:G	C:C	T:C	T:T	T:A	G:A	A:A	A:A	G:A	G:G	C:A	G:G	T:C	T:C	G:G	C:C	A:A	C:C	A:A	G:G	T:T	G:G	T:T	A:A	T:T	G:A	G:A	T:C	G:G	A:A	G:G	G:G	G:C	G:G	C:C	G:C	G:A	T:T
NLS-3-7F	T:C	T:A	G:G	T:G	G:C	G:G	T:G	G:A	G:G	C:C	A:A	G:G	C:A	T:C	T:T	A:A	G:A	G:A	G:A	G:A	G:A	C:A	G:A	T:T	C:C	G:G	T:C	G:A	C:C	A:A	T:T	T:T	T:T	T:T	A:A	T:C	G:A	G:A	C:C	G:A	T:A	G:G	G:A	G:C	G:C	T:T	C:C	G:A	T:T
NLS-3-7G	C:C	?	G:G	T:G	C:C	T:G	T:T	G:A	C:C	C:C	C:A	G:G	C:A	C:C	T:T	T:A	G:A	G:A	A:A	A:A	G:G	C:A	G:A	T:C	T:C	G:G	C:C	G:G	C:C	G:A	G:G	T:T	T:G	T:T	A:A	C:C	G:G	G:G	C:C	G:A	T:A	G:G	G:G	G:C	G:G	T:C	C:C	A:A	T:T
NLS-3-7H	C:C	?	G:G	G:G	G:C	G:G	T:T	G:G	C:C	C:A	C:A	G:G	A:A	T:C	T:C	A:A	A:A	G:G	G:A	G:A	G:A	A:A	G:A	T:T	T:T	T:G	T:C	A:A	C:C	A:A	T:T	T:C	T:T	T:A	A:A	T:T	G:A	G:A	C:C	A:A	T:T	G:C	G:G	G:G	G:C	T:T	G:C	A:A	T:T
NLS-3-8A	C:C	A:A	G:C	T:T	C:C	G:G	T:T	G:G	G:C	A:A	C:A	G:G	C:A	T:T	C:C	T:A	G:G	A:A	G:A	A:A	G:G	C:A	G:A	C:C	T:T	G:G	C:C	G:A	C:C	G:A	G:G	T:T	T:G	T:T	A:A	C:C	A:A	G:A	T:C	G:A	T:T	G:C	G:G	C:C	G:G	T:T	C:C	A:A	T:T
NLS-3-8B	C:C	?	G:G	G:G	G:G	T:G	T:T	G:G	C:C	A:A	A:A	G:G	C:A	T:C	T:C	A:A	A:A	G:A	A:A	G:G	G:A	C:C	A:A	T:C	T:C	G:G	T:C	A:A	C:C	G:A	G:G	T:T	T:G	T:T	A:A	T:C	G:A	G:G	T:C	G:A	A:A	G:G	G:G	C:C	G:C	C:C	C:C	A:A	T:T
NLS-3-8C	C:C	T:A	C:C	T:G	G:C	G:G	T:T	A:A	C:C	C:A	C:A	T:G	A:A	T:T	T:C	T:A	G:A	G:G	G:G	A:A	G:G	C:A	G:A	T:C	T:T	G:G	C:C	G:G	C:C	G:A	G:G	T:T	T:T	T:T	A:A	C:C	G:A	G:A	C:C	G:G	T:T	G:C	G:A	G:C	G:G	T:C	G:C	A:A	T:T
NLS-3-8D	T:C	?	G:C	T:G	G:C	G:G	T:T	G:G	C:C	A:A	C:A	G:G	C:A	C:C	T:T	A:A	G:A	A:A	A:A	A:A	G:A	C:A	G:G	T:T	T:T	T:G	T:C	A:A	C:C	A:A	G:G	T:T	T:G	T:T	A:A	C:C	G:A	?	T:C	G:G	T:T	G:C	G:G	C:C	G:C	T:C	C:C	A:A	T:T
NLS-3-8E	T:C	?	G:G	T:G	C:C	G:G	T:G	G:G	C:C	C:C	C:C	?	C:A	T:C	T:T	A:A	G:A	A:A	G:G	A:A	G:G	C:A	G:A	T:C	T:T	T:G	C:C	G:A	C:C	G:A	G:G	T:T	T:T	T:T	A:A	C:C	A:A	G:A	C:C	G:A	T:A	G:G	G:G	C:C	G:G	T:C	G:G	G:A	T:T
NLS-3-8F	T:C	A:A	G:G	T:G	G:C	T:G	T:T	G:A	G:G	C:A	C:A	G:G	C:A	T:T	T:C	A:A	G:A	A:A	G:A	G:A	G:A	C:C	G:A	T:C	T:C	G:G	T:C	A:A	C:C	A:A	G:G	T:C	T:G	T:T	A:A	T:C	G:A	G:G	C:C	A:A	T:T	G:G	G:A	G:C	G:C	T:T	G:C	A:A	T:T
NLS-3-8G	C:C	T:T	G:G	G:G	G:C	G:G	T:T	G:G	C:C	C:A	C:C	T:G	A:A	T:T	T:C	T:A	A:A	G:G	G:A	G:A	G:G	C:C	G:G	T:C	C:C	G:G	C:C	G:A	C:C	G:A	T:T	T:T	T:T	T:T	A:A	C:C	G:G	G:A	C:C	G:A	T:T	G:C	G:A	G:G	G:G	T:C	C:C	A:A	T:T
NLS-3-8H	T:C	T:A	G:G	T:G	C:C	G:G	T:T	G:G	C:C	C:A	C:A	T:G	C:A	T:C	T:T	A:A	G:A	A:A	A:A	G:A	G:G	A:A	G:A	T:C	T:T	G:G	C:C	G:A	C:C	G:A	G:G	T:T	G:G	T:T	A:A	T:C	G:A	?	T:C	G:A	A:A	G:G	G:A	C:C	G:G	T:C	C:C	G:G	T:T
NLS-3-9A	C:C	A:A	G:C	T:T	G:C	G:G	T:T	G:G	C:C	C:C	C:A	G:G	A:A	C:C	T:C	T:A	G:G	A:A	G:G	A:A	G:G	A:A	G:A	T:T	T:T	T:G	C:C	A:A	C:C	A:A	G:G	T:T	T:G	T:T	A:A	T:T	G:A	G:A	T:C	A:A	T:T	G:G	G:A	G:C	G:G	T:C	C:C	G:A	T:T
NLS-3-9B	C:C	T:A	G:G	T:G	G:C	T:G	T:G	G:A	G:C	C:C	A:A	G:G	C:A	T:T	T:T	T:A	G:A	A:A	G:A	G:A	G:G	C:C	G:G	T:T	T:T	G:G	C:C	A:A	C:C	A:A	G:G	T:T	T:G	T:T	A:A	T:C	A:A	G:G	T:C	A:A	T:A	G:G	G:A	C:C	G:G	T:C	G:G	A:A	T:T
NLS-3-9C	T:C	?	G:G	G:G	C:C	G:G	T:T	G:G	C:C	C:C	C:A	T:T	C:A	T:T	T:C	A:A	A:A	G:A	A:A	G:A	G:G	C:A	G:A	T:T	T:C	T:T	C:C	A:A	C:C	G:A	G:G	T:C	T:T	T:T	A:A	T:C	A:A	G:A	C:C	G:A	T:T	G:G	G:A	C:C	G:G	T:T	G:C	G:A	T:T
NLS-3-9D	T:C	A:A	C:C	T:G	G:C	G:G	T:T	G:A	C:C	C:A	C:A	G:G	C:A	T:C	T:T	A:A	G:A	G:A	G:A	A:A	G:A	C:C	G:A	C:C	C:C	T:G	T:C	A:A	C:C	G:G	G:G	T:C	T:T	T:A	A:A	T:C	A:A	G:G	T:T	?	T:T	G:G	G:A	C:C	G:C	T:C	C:C	A:A	T:T
NLS-3-9E	T:T	?	G:C	G:G	C:C	T:G	T:T	G:G	C:C	A:A	A:A	T:G	C:C	T:T	T:C	A:A	A:A	G:G	G:G	G:A	G:G	C:C	A:A	C:C	T:T	T:G	?	G:G	C:C	G:A	G:G	C:C	G:G	T:A	A:A	T:C	A:A	?	T:C	G:A	?	G:G	G:G	C:C	G:G	T:T	C:C	A:A	T:T
NLS-3-9F	C:C	?	G:G	G:G	G:C	G:G	T:T	G:G	C:C	C:C	C:A	T:G	C:A	T:C	T:T	A:A	A:A	A:A	G:G	G:A	G:A	C:C	G:G	T:T	T:C	T:G	T:C	G:A	C:C	G:A	G:G	T:T	T:T	T:T	A:A	T:C	G:A	A:A	C:C	A:A	T:T	G:G	G:G	G:C	G:C	T:C	G:C	A:A	T:T
NLS-3-9G	C:C	?	G:G	G:G	C:C	T:G	T:G	A:A	C:C	A:A	C:A	T:G	C:A	?	C:C	A:A	A:A	G:A	A:A	G:A	G:G	C:A	G:A	T:T	T:C	G:G	C:C	G:A	C:C	G:A	G:G	T:T	T:G	T:T	A:A	T:C	G:G	G:G	T:T	A:A	T:A	G:G	G:G	G:C	G:G	T:C	G:C	G:A	T:T
NLS-3-9H	C:C	?	G:G	G:G	G:C	G:G	T:G	G:G	C:C	C:A	A:A	G:G	A:A	C:C	T:C	T:A	A:A	G:A	A:A	G:A	G:A	A:A	G:A	T:T	C:C	G:G	T:C	G:G	C:C	G:G	G:G	T:C	T:T	T:A	A:A	T:C	G:G	?	T:T	G:A	T:T	G:G	G:A	C:C	G:C	T:T	G:C	G:A	T:T
NLS-4-1A	?	T:T	G:C	T:G	C:C	G:G	T:T	G:G	C:C	C:A	C:C	T:G	C:A	T:T	T:C	A:A	G:A	G:A	?	?	?	C:C	G:A	T:C	T:C	G:G	C:C	A:A	C:C	G:G	G:G	T:T	G:G	?	?	?	?	G:A	?	?	?	G:G	G:A	C:C	G:G	?	G:C	?	?
NLS-4-1B	C:C	A:A	G:G	G:G	G:C	G:G	T:T	G:G	C:C	C:C	A:A	T:G	C:A	?	T:C	T:A	A:A	G:A	A:A	G:A	G:A	C:A	G:A	T:T	T:T	G:G	T:C	A:A	C:A	A:A	G:G	T:T	G:G	T:T	A:A	T:T	?	G:G	T:T	A:A	T:A	G:G	G:G	G:C	G:C	T:T	C:C	A:A	T:T
NLS-4-1C	T:C	A:A	G:G	T:G	C:C	G:G	T:T	G:G	C:C	C:A	A:A	T:G	C:A	C:C	T:T	T:A	G:A	G:A	A:A	G:A	G:G	A:A	G:A	T:C	T:C	T:G	C:C	G:A	C:C	G:G	G:G	T:T	T:T	T:T	A:A	T:C	G:A	G:G	T:C	G:A	T:A	G:G	G:A	C:C	G:G	T:C	C:C	A:A	T:T
NLS-4-1D	C:C	A:A	G:C	G:G	G:C	T:G	T:T	G:A	C:C	A:A	C:A	?	C:C	T:T	T:T	T:T	A:A	A:A	A:A	A:A	G:A	C:A	G:A	T:C	T:T	G:G	T:C	G:A	C:C	?	G:G	T:T	T:G	T:T	A:A	T:C	G:A	?	C:C	G:G	?	G:G	G:G	C:C	G:C	T:C	C:C	G:A	T:T
NLS-4-1E	T:C	T:A	G:C	T:G	C:C	G:G	T:G	G:A	G:C	C:C	A:A	T:T	C:C	C:C	T:C	T:A	G:A	A:A	A:A	A:A	G:G	C:C	G:A	T:T	T:T	T:T	C:C	A:A	C:C	G:A	G:G	T:T	T:G	T:T	A:A	T:C	G:A	?	C:C	G:A	A:A	G:G	G:A	C:C	G:G	C:C	C:C	A:A	T:T
NS-2-4A	T:C	T:T	G:C	G:G	C:C	G:G	T:T	G:G	C:C	C:C	A:A	G:G	C:A	T:C	C:C	A:A	A:A	G:A	A:A	A:A	G:G	C:A	G:A	T:T	T:T	T:G	C:C	G:A	C:C	G:G	G:G	T:T	T:G	T:T	A:A	C:C	G:G	G:A	C:C	G:A	T:T	G:G	A:A	G:G	G:G	T:T	G:C	G:G	T:T
NS-2-4B	C:C	A:A	G:G	G:G	C:C	G:G	T:T	G:A	C:C	C:A	C:C	T:G	A:A	T:T	T:T	A:A	A:A	G:A	A:A	A:A	G:G	C:C	G:G	T:T	T:T	T:G	C:C	A:A	C:C	G:A	G:G	T:T	T:G	T:T	A:A	C:C	G:A	G:A	T:C	G:A	T:T	G:C	G:A	G:C	G:G	T:T	G:G	A:A	T:T
NS-2-4C	T:T	?	G:C	G:G	C:C	G:G	T:T	A:A	C:C	C:A	A:A	T:G	A:A	T:T	T:T	A:A	A:A	G:G	A:A	A:A	G:G	C:C	A:A	T:T	T:T	T:T	C:C	A:A	C:C	G:G	G:G	T:T	T:T	T:T	A:A	T:C	A:A	G:G	T:C	A:A	T:T	G:G	G:G	C:C	G:G	T:C	G:G	A:A	T:T
NS-2-4D	T:T	T:A	C:C	T:G	G:C	G:G	T:T	G:G	C:C	C:C	C:A	T:G	A:A	T:T	T:T	A:A	G:A	G:A	A:A	G:A	G:A	C:A	A:A	T:T	T:T	T:G	T:C	A:A	C:C	G:G	G:G	T:C	T:T	T:A	A:A	T:C	G:A	A:A	C:C	A:A	T:T	G:G	G:G	G:C	G:C	T:C	G:C	?	T:A
NS-2-4E	C:C	T:A	G:C	G:G	C:C	G:G	T:T	G:G	C:C	C:A	C:A	T:G	A:A	T:C	T:C	T:A	A:A	G:A	A:A	G:G	G:G	C:A	G:G	T:T	T:T	T:T	C:C	G:A	C:C	A:A	G:G	T:T	G:G	T:T	A:A	T:C	G:A	?	C:C	A:A	?	G:G	G:A	C:C	G:G	T:T	C:C	?	T:A
NS-2-4F	C:C	?	C:C	G:G	C:C	G:G	T:T	G:A	C:C	C:A	C:C	T:T	C:A	T:T	T:T	T:A	A:A	G:A	G:A	G:A	G:G	C:A	G:G	T:T	T:T	T:G	C:C	A:A	C:C	G:G	G:G	T:T	T:T	T:T	A:A	T:C	G:A	G:G	C:C	G:A	T:T	G:G	G:G	G:C	G:G	T:C	C:C	A:A	T:A
NS-2-4G	C:C	T:A	G:G	G:G	G:C	G:G	T:T	G:G	C:C	C:C	C:C	T:G	A:A	C:C	T:C	A:A	A:A	G:A	A:A	A:A	G:A	C:C	A:A	T:T	T:T	G:G	T:T	G:A	C:C	G:G	G:G	T:T	T:T	T:T	A:A	C:C	G:A	?	T:C	G:A	T:T	G:G	G:G	G:C	G:C	T:T	G:C	A:A	T:T
NS-2-4H	C:C	T:A	C:C	T:G	G:G	G:G	T:T	G:G	C:C	C:A	A:A	G:G	C:A	T:C	T:T	A:A	G:A	G:A	A:A	A:A	A:A	C:A	G:G	T:C	T:C	T:T	T:T	G:A	C:C	G:A	G:G	T:T	T:G	T:T	A:A	C:C	G:A	A:A	T:C	A:A	T:T	G:G	G:G	G:C	C:C	T:T	C:C	G:A	T:T
NS-2-5A	C:C	A:A	G:G	T:G	G:G	G:G	T:T	G:A	C:C	C:C	A:A	G:G	A:A	C:C	T:T	A:A	G:A	G:G	G:G	G:G	A:A	C:C	G:G	T:T	T:T	T:T	T:T	A:A	C:C	G:G	G:G	T:T	G:G	T:T	A:A	C:C	A:A	?	C:C	G:A	T:T	G:G	G:A	G:C	C:C	T:C	G:G	A:A	T:T
NS-2-5B	?	?	G:G	G:G	G:G	G:G	T:T	G:G	C:C	A:A	A:A	?	C:A	C:C	T:C	A:A	A:A	A:A	G:A	?	?	C:C	G:A	T:T	T:T	T:T	T:T	A:A	C:C	G:G	G:G	T:T	T:T	T:T	?	T:C	?	G:A	C:C	G:G	T:A	G:G	G:A	C:C	C:C	T:T	C:C	A:A	T:T
NS-2-5C	T:T	T:T	G:G	G:G	C:C	T:G	T:T	G:G	G:C	A:A	C:A	T:G	C:A	T:C	T:T	A:A	A:A	G:G	G:A	G:A	G:G	C:A	G:G	T:T	T:T	T:G	C:C	G:G	C:C	G:G	G:G	T:T	G:G	T:T	A:A	T:T	G:A	G:G	C:C	A:A	T:T	G:G	G:G	G:C	G:G	T:T	G:C	G:A	T:T
NS-2-5D	T:C	T:A	C:C	G:G	G:C	G:G	T:T	A:A	C:C	C:C	C:A	T:T	A:A	T:C	T:C	T:A	A:A	A:A	A:A	A:A	G:A	C:A	A:A	T:T	T:T	T:T	T:C	A:A	C:C	A:A	G:G	T:T	G:G	T:T	A:A	T:C	A:A	A:A	C:C	G:A	T:A	G:G	G:A	G:C	G:C	C:C	C:C	G:G	T:T
NS-2-5E	T:C	T:A	G:G	T:T	G:C	G:G	T:T	G:G	?	C:C	A:A	T:T	C:A	T:T	T:C	A:A	G:G	G:A	G:A	G:A	G:A	C:A	A:A	T:T	T:T	G:G	T:C	A:A	C:C	G:A	G:G	T:T	G:G	T:T	A:A	T:C	G:A	A:A	T:T	A:A	A:A	G:G	G:G	G:G	G:C	T:T	G:C	G:A	T:T
NS-2-5F	T:C	T:T	G:C	G:G	C:C	G:G	T:T	G:A	C:C	C:C	A:A	T:G	C:A	T:T	T:C	T:A	A:A	A:A	A:A	G:A	G:G	C:A	G:A	T:C	T:T	T:G	C:C	G:A	C:C	G:A	G:G	T:T	T:G	T:T	A:A	T:C	A:A	G:A	T:C	G:A	T:T	G:G	G:A	G:C	G:G	T:T	C:C	?	T:T
NS-2-5G	C:C	A:A	C:C	T:G	G:G	G:G	T:T	G:G	C:C	C:C	A:A	T:G	A:A	T:C	T:T	A:A	G:A	G:G	G:A	G:A	A:A	C:A	G:G	T:T	T:C	T:G	T:T	A:A	C:C	G:A	G:G	T:T	T:G	T:T	A:A	C:C	G:A	G:A	T:C	A:A	T:T	G:G	G:G	G:G	C:C	T:C	C:C	G:A	T:T
NS-2-5H	C:C	?	G:C	T:G	G:G	T:G	T:T	G:G	C:C	A:A	A:A	G:G	A:A	T:C	C:C	A:A	G:A	G:G	G:A	A:A	G:G	C:C	A:A	T:C	T:C	T:T	C:C	A:A	C:C	G:A	G:G	T:T	G:G	T:T	A:A	T:C	G:A	G:G	C:C	G:A	T:T	C:C	G:A	G:C	G:G	T:T	G:C	A:A	T:T
NS-2-6A	C:C	A:A	G:C	G:G	C:C	G:G	T:T	G:G	C:C	C:A	C:A	G:G	A:A	T:C	T:T	A:A	A:A	G:G	G:A	A:A	G:G	C:A	A:A	T:T	T:T	T:T	C:C	A:A	C:C	G:A	G:G	T:T	T:G	T:T	A:A	C:C	A:A	A:A	C:C	G:G	T:T	G:C	G:G	C:C	G:G	T:T	G:C	A:A	T:A
NS-2-6B	C:C	?	G:G	T:G	G:G	G:G	T:T	G:A	?	?	C:A	G:G	C:A	T:T	T:C	A:A	G:A	G:A	A:A	A:A	A:A	C:A	A:A	T:T	T:T	T:G	T:T	A:A	C:C	?	G:G	T:T	T:T	T:T	A:A	T:C	G:A	?	T:T	A:A	T:T	G:G	G:G	G:C	C:C	T:T	G:C	?	T:T
NS-2-6C	C:C	T:T	C:C	T:G	G:G	T:G	T:T	G:G	C:C	A:A	C:A	G:G	A:A	T:T	T:T	A:A	G:A	G:A	A:A	G:A	G:A	C:A	A:A	T:T	T:T	T:G	T:C	A:A	C:C	G:G	G:G	T:T	T:T	T:T	A:A	C:C	G:A	?	C:C	G:A	T:T	G:C	G:G	G:C	G:C	T:T	G:C	A:A	T:T
NS-2-6D	T:T	?	G:C	G:G	C:C	G:G	T:T	G:G	C:C	A:A	C:C	T:G	A:A	C:C	C:C	A:A	A:A	G:G	A:A	A:A	G:G	C:C	A:A	T:T	T:C	T:G	C:C	G:A	C:C	G:A	G:G	T:T	T:G	T:T	A:A	T:C	G:A	G:A	C:C	?	?	G:C	G:A	C:C	G:G	T:T	G:C	?	T:T
NS-2-6E	T:C	T:A	C:C	G:G	C:C	G:G	T:T	G:A	C:C	C:C	C:A	G:G	C:A	?	T:C	T:A	A:A	G:A	A:A	G:A	G:G	C:A	G:A	T:C	T:T	G:G	C:C	A:A	C:C	G:A	G:G	T:T	T:T	T:T	A:A	T:C	A:A	G:A	T:C	A:A	T:T	G:G	G:G	G:C	G:G	T:C	G:C	A:A	T:A
NS-2-6F	T:C	T:A	G:C	T:G	C:C	G:G	T:T	A:A	?	C:C	C:C	G:G	C:C	T:C	T:T	A:A	G:A	G:A	G:A	G:A	G:G	C:A	A:A	T:T	T:T	T:G	C:C	A:A	C:C	A:A	G:G	T:T	G:G	T:T	A:A	T:C	G:A	?	C:C	A:A	T:T	G:C	A:A	G:C	G:G	T:T	G:C	A:A	T:T
NS-2-6G	C:C	?	C:C	G:G	C:C	G:G	T:T	G:G	C:C	C:A	A:A	T:G	A:A	T:T	T:C	A:A	A:A	G:A	A:A	G:A	G:G	C:C	G:A	T:T	T:T	T:G	C:C	A:A	C:C	G:G	G:G	T:T	T:T	T:T	A:A	T:C	G:G	G:G	C:C	G:A	T:T	G:C	G:A	G:C	G:G	T:T	C:C	A:A	T:T
NS-2-6H	T:C	T:T	G:G	G:G	G:C	G:G	T:T	G:G	G:C	C:A	A:A	T:G	C:A	T:T	T:T	A:A	A:A	G:G	G:G	A:A	G:A	C:C	A:A	T:C	T:T	G:G	T:C	A:A	C:C	G:A	G:G	T:C	T:T	T:T	A:A	C:C	G:A	G:A	T:C	G:A	T:T	G:G	G:A	C:C	G:C	T:T	C:C	A:A	T:T
NS-2-7A	C:C	T:A	G:G	T:G	G:C	G:G	T:T	G:G	C:C	C:A	A:A	T:G	C:A	T:C	T:T	A:A	G:A	G:A	G:A	G:A	G:A	C:A	G:A	T:T	T:T	T:G	T:C	G:A	C:C	G:A	G:G	T:T	G:G	T:T	A:A	C:C	G:A	G:A	C:C	G:G	T:T	G:G	G:G	C:C	G:C	T:T	G:C	G:A	T:T
NS-2-7B	T:C	T:A	G:G	T:G	C:C	G:G	T:T	G:G	?	C:A	A:A	G:G	C:A	T:T	T:T	A:A	G:A	G:A	A:A	A:A	G:G	C:C	A:A	T:C	T:T	T:G	C:C	G:A	C:C	G:G	G:G	T:T	T:G	T:T	A:A	T:C	A:A	?	T:C	G:A	T:A	G:C	G:G	C:C	G:G	T:T	C:C	A:A	T:A
NS-2-7C	C:C	?	G:C	G:G	C:C	G:G	T:T	G:G	C:C	C:A	C:A	G:G	A:A	T:T	T:C	A:A	A:A	G:A	A:A	G:A	G:G	C:C	G:A	T:T	T:T	T:G	C:C	A:A	C:C	G:A	G:G	T:T	T:T	T:T	A:A	T:C	A:A	G:G	C:C	G:A	T:T	G:G	G:A	G:C	G:G	T:T	G:C	A:A	T:T
NS-2-7D	T:C	A:A	G:C	T:G	G:G	G:G	T:T	G:A	C:C	A:A	C:C	T:G	A:A	T:T	T:T	A:A	G:A	G:A	A:A	G:A	A:A	C:A	G:A	T:T	T:T	T:G	T:T	A:A	C:C	G:G	G:G	T:T	T:T	T:T	A:A	C:C	G:A	A:A	C:C	A:A	T:T	G:G	G:G	C:C	C:C	T:T	G:G	G:A	T:T
NS-2-7E	T:T	?	G:G	G:G	C:C	G:G	T:T	G:A	G:C	C:A	A:A	T:G	A:A	T:T	?	A:A	A:A	G:A	G:A	A:A	G:G	C:A	A:A	T:T	T:T	G:G	C:C	A:A	C:C	G:G	G:G	T:C	T:T	T:T	A:A	T:C	G:A	G:A	C:C	G:A	T:T	G:G	G:G	G:C	G:G	?	C:C	G:A	T:T
NS-2-7F	T:T	T:A	G:C	G:G	G:C	G:G	T:T	G:G	C:C	A:A	C:A	G:G	A:A	T:C	C:C	A:A	A:A	G:A	A:A	A:A	G:A	C:C	G:A	T:T	T:C	T:G	T:C	G:A	C:C	G:G	G:G	T:T	T:G	T:T	A:A	T:C	A:A	G:A	C:C	G:A	T:T	G:G	G:A	G:C	G:C	T:T	G:C	A:A	T:A
NS-2-7G	T:C	T:A	G:G	G:G	G:C	G:G	T:T	G:A	C:C	C:C	A:A	G:G	A:A	T:C	T:C	A:A	A:A	G:A	G:A	G:G	G:A	C:A	G:A	T:T	T:T	G:G	T:C	A:A	C:C	G:G	G:G	T:T	T:G	T:T	A:A	T:C	G:A	A:A	C:C	?	T:T	G:G	A:A	C:C	G:C	T:T	G:C	G:A	T:T
NS-2-7H	T:C	T:A	G:C	T:G	C:C	G:G	T:T	G:A	?	C:C	A:A	G:G	A:A	T:C	T:C	A:A	G:A	G:A	A:A	A:A	G:G	C:C	A:A	T:T	T:C	T:G	C:C	G:A	C:C	G:G	G:G	T:C	T:G	T:T	A:A	C:C	A:A	?	C:C	A:A	T:T	G:C	G:G	C:C	G:G	C:C	C:C	A:A	T:T
NS-2-8A	T:C	A:A	C:C	G:G	G:C	G:G	T:T	G:G	C:C	C:C	A:A	T:G	C:A	T:T	T:C	A:A	A:A	G:A	A:A	A:A	G:A	C:C	A:A	T:T	T:T	T:T	T:C	A:A	C:C	G:A	G:G	T:T	T:G	T:T	A:A	T:T	G:A	A:A	T:C	G:G	T:T	G:C	G:G	G:C	G:C	T:T	G:C	A:A	T:T
NS-2-8B	T:C	A:A	G:C	T:G	C:C	G:G	T:T	G:A	C:C	C:A	A:A	G:G	A:A	?	T:C	A:A	G:A	G:A	G:A	G:G	G:G	C:A	A:A	T:T	T:T	T:G	C:C	A:A	C:C	?	G:G	T:T	T:G	T:T	A:A	T:C	G:G	G:A	C:C	A:A	T:T	G:G	A:A	C:C	G:G	T:T	G:G	G:A	T:T
NS-2-8C	T:C	A:A	G:C	G:G	C:C	G:G	T:T	G:G	C:C	A:A	A:A	T:T	A:A	T:T	T:C	A:A	A:A	G:A	A:A	A:A	G:G	C:A	G:G	T:T	T:C	G:G	C:C	G:A	C:C	G:A	G:G	T:T	G:G	T:T	A:A	T:C	G:A	G:A	C:C	G:A	T:T	G:G	A:A	G:G	G:G	T:T	C:C	G:A	T:T
NS-2-8D	T:C	T:A	G:C	T:G	G:G	G:G	T:T	G:A	G:C	C:C	A:A	G:G	A:A	T:T	T:C	T:A	G:A	G:A	G:A	A:A	A:A	C:A	G:A	T:T	T:T	T:G	T:T	A:A	C:C	G:A	G:G	T:T	T:T	T:T	A:A	T:C	A:A	G:G	C:C	A:A	T:A	G:G	G:G	C:C	C:C	C:C	G:C	A:A	T:T
NS-2-8E	T:C	A:A	G:C	G:G	G:C	T:G	T:T	G:G	C:C	C:C	A:A	?	A:A	T:T	T:C	A:A	A:A	G:A	A:A	A:A	G:A	C:C	G:G	T:T	T:T	G:G	T:C	G:A	C:C	A:A	G:G	T:T	T:G	T:T	A:A	T:C	G:G	A:A	C:C	G:A	T:T	G:G	G:G	G:C	G:C	T:T	C:C	G:A	T:T
NS-2-8F	C:C	A:A	G:C	T:G	G:G	G:G	T:T	G:G	C:C	C:A	A:A	G:G	A:A	T:T	T:C	A:A	G:A	G:A	G:A	G:A	A:A	C:A	A:A	T:T	T:C	T:T	T:T	G:A	C:C	G:A	G:G	T:T	T:T	T:T	A:A	C:C	G:A	A:A	C:C	A:A	T:T	G:C	G:A	G:C	C:C	T:T	G:C	G:A	T:T
NS-2-8G	C:C	?	G:C	G:G	G:G	G:G	T:T	G:G	C:C	C:C	A:A	?	C:A	?	T:T	A:A	A:A	G:G	G:A	G:A	A:A	C:C	G:A	T:C	T:T	T:T	T:T	G:A	C:C	G:A	G:G	T:T	T:T	T:T	A:A	C:C	G:A	A:A	C:C	A:A	T:A	G:G	G:G	C:C	C:C	T:T	C:C	A:A	T:T
NS-2-8H	T:C	?	C:C	G:G	C:C	G:G	T:T	G:G	C:C	C:C	C:A	T:G	A:A	T:C	T:T	T:A	A:A	G:A	A:A	G:A	G:G	A:A	G:A	T:T	T:T	T:G	T:C	A:A	C:C	G:G	G:G	T:T	T:T	T:T	A:A	C:C	G:A	G:G	T:C	G:A	T:T	C:C	G:A	C:C	G:G	T:C	G:C	G:A	T:A
NS-2-9A	T:C	?	G:G	G:G	C:C	G:G	T:T	G:G	G:C	A:A	C:A	T:G	C:A	T:T	T:T	A:A	A:A	G:A	A:A	A:A	G:G	C:A	G:A	T:C	T:T	T:G	C:C	A:A	C:C	G:A	G:G	T:T	T:T	T:T	A:A	T:C	G:A	G:G	C:C	A:A	T:A	G:G	G:G	C:C	G:G	T:T	C:C	G:A	T:T
NS-2-9B	C:C	?	C:C	T:G	G:G	G:G	T:T	G:G	C:C	C:C	A:A	G:G	C:A	T:C	T:T	A:A	G:A	G:G	G:A	G:A	A:A	C:A	G:G	T:T	T:C	G:G	T:T	G:A	C:C	G:A	G:G	T:T	T:G	T:T	A:A	C:C	G:A	G:A	T:C	A:A	T:T	G:G	G:G	G:C	C:C	T:C	C:C	G:A	T:T
NS-2-9C	?	A:A	G:G	G:G	G:C	G:G	T:T	G:G	C:C	A:A	?	?	?	?	C:C	A:A	A:A	G:A	A:A	A:A	?	A:A	A:A	T:T	?	T:G	T:C	G:A	C:C	G:A	G:G	T:T	T:G	T:T	?	?	?	G:G	?	?	?	G:C	G:A	G:C	G:C	T:T	?	G:G	T:A
NS-2-9D	T:C	?	G:C	T:G	C:C	G:G	T:T	G:G	C:C	C:C	A:A	G:G	A:A	T:T	T:C	A:A	G:A	G:G	G:A	G:A	G:G	C:C	G:A	T:C	T:T	T:T	C:C	A:A	C:C	G:G	G:G	T:T	T:G	T:T	A:A	T:T	G:A	?	C:C	A:A	?	G:G	G:G	C:C	G:G	T:T	G:C	A:A	T:T
NS-2-9E	T:C	?	C:C	G:G	G:C	G:G	T:T	A:A	C:C	C:C	C:A	T:T	C:A	T:C	T:C	T:A	A:A	A:A	G:A	A:A	G:A	C:C	A:A	T:T	T:T	T:T	T:C	A:A	C:C	G:A	G:G	T:T	G:G	T:T	A:A	T:C	G:A	A:A	T:C	G:A	T:T	G:G	G:A	C:C	G:C	T:T	C:C	A:A	T:T
NS-2-9F	C:C	T:T	G:G	G:G	G:C	T:G	T:T	G:G	C:C	C:A	A:A	G:G	C:A	T:T	T:C	T:A	A:A	G:G	G:A	G:A	G:A	C:A	G:A	T:C	T:T	G:G	T:C	G:A	C:C	G:A	G:G	T:T	T:T	T:T	A:A	T:C	A:A	?	C:C	A:A	T:T	G:G	G:G	C:C	G:C	T:C	G:C	G:A	T:T
NS-2-9G	T:C	T:A	C:C	G:G	G:C	G:G	T:T	A:A	C:C	A:A	A:A	G:G	A:A	T:C	T:C	A:A	A:A	A:A	G:A	A:A	G:A	C:C	A:A	T:C	T:C	T:T	T:C	A:A	C:C	G:G	G:G	T:T	T:T	T:T	A:A	T:C	A:A	A:A	T:C	G:A	T:A	G:G	G:A	C:C	G:C	T:T	G:C	G:A	T:T
NS-2-9H	T:T	?	C:C	G:G	G:C	G:G	T:T	A:A	C:C	C:A	A:A	T:T	C:A	T:T	T:T	A:A	A:A	A:A	A:A	A:A	G:A	C:C	G:A	T:T	T:C	T:T	T:C	A:A	C:C	G:G	G:G	T:T	T:T	T:T	A:A	T:C	?	A:A	C:C	G:A	T:T	G:G	G:A	C:C	G:C	T:T	C:C	G:G	T:T
KP-2-10A	T:C	A:A	G:G	G:G	C:C	G:G	T:T	G:A	?	A:A	C:A	G:G	C:A	T:C	T:T	A:A	A:A	G:A	G:A	A:A	G:G	A:A	G:A	T:T	T:T	T:G	C:C	G:A	C:C	G:G	G:G	T:C	T:T	T:T	A:A	T:C	A:A	G:G	T:C	G:A	T:T	G:G	G:G	C:C	G:G	T:T	G:C	A:A	?
KP-2-10B	C:C	A:A	G:G	T:T	G:G	G:G	T:T	G:A	C:C	C:A	C:A	G:G	C:A	T:T	T:T	A:A	G:G	G:A	G:A	G:A	G:A	A:A	A:A	C:C	T:C	T:G	T:C	G:A	C:C	G:G	G:G	T:T	T:G	T:T	A:A	C:C	G:A	G:A	C:C	G:A	T:T	G:G	G:G	G:G	G:C	T:T	G:C	G:G	T:T
KP-2-10C	C:C	A:A	G:G	G:G	G:C	G:G	T:T	G:A	G:C	C:A	C:A	G:G	C:A	T:C	T:T	A:A	A:A	A:A	G:G	A:A	G:A	C:C	A:A	T:C	T:T	G:G	T:C	A:A	C:C	G:G	G:G	T:C	T:T	T:A	A:A	T:C	G:A	G:A	C:C	A:A	T:T	G:C	G:A	G:C	G:C	T:T	G:C	A:A	T:T
KP-2-10D	C:C	A:A	G:G	G:G	C:C	T:T	T:T	G:A	?	C:A	C:A	T:T	C:A	T:T	T:C	A:A	A:A	G:A	G:A	G:A	G:G	A:A	G:G	T:T	T:T	T:G	C:C	A:A	C:A	G:G	G:G	T:T	T:G	T:T	G:A	C:C	G:A	A:A	C:C	A:A	T:T	G:G	G:G	G:C	G:G	T:C	G:C	G:A	T:T
KP-2-10E	T:T	A:A	G:C	G:G	G:C	G:G	T:T	A:A	C:C	C:C	A:A	T:G	C:A	T:T	T:C	A:A	A:A	G:A	G:G	G:A	G:A	C:C	A:A	T:C	T:T	G:G	T:C	G:A	C:C	G:A	G:G	T:T	G:G	T:T	A:A	C:C	A:A	G:G	C:C	G:A	T:T	G:G	G:A	G:C	G:C	T:C	G:G	A:A	T:T
KP-2-10F	C:C	?	G:C	G:G	C:C	G:G	T:T	G:A	C:C	C:A	C:A	G:G	C:A	T:C	T:T	T:A	A:A	G:A	A:A	G:A	G:G	A:A	G:G	T:C	T:T	G:G	C:C	A:A	C:C	G:G	G:G	T:C	T:T	T:T	A:A	T:C	G:A	A:A	T:T	A:A	T:T	G:C	G:G	G:C	G:G	T:C	G:G	A:A	T:T
KP-2-10G	C:C	A:A	G:G	T:G	C:C	G:G	T:T	G:A	C:C	C:C	C:A	T:G	C:C	T:C	T:T	A:A	G:A	G:A	G:A	A:A	G:G	C:A	G:G	T:C	T:C	T:T	C:C	A:A	C:C	G:A	G:G	T:T	T:G	T:T	A:A	T:T	G:A	G:G	T:C	A:A	T:T	G:G	G:G	C:C	G:G	T:C	C:C	G:A	T:T
KP-2-10H	T:C	A:A	G:G	T:G	G:C	T:G	T:T	G:A	?	C:C	C:A	G:G	C:A	T:C	T:C	A:A	G:A	A:A	G:G	A:A	G:A	C:C	G:G	T:T	T:T	T:T	T:C	A:A	C:C	G:A	G:G	T:T	T:G	T:T	A:A	T:C	A:A	G:G	T:C	A:A	T:A	G:C	A:A	G:C	G:C	T:T	G:C	G:A	T:T
KP-2-11A	T:C	A:A	G:G	T:G	G:C	G:G	T:T	G:G	C:C	?	C:A	T:G	A:A	T:C	T:T	A:A	G:A	G:A	A:A	G:A	G:A	C:A	G:A	T:C	T:T	G:G	T:C	A:A	C:C	G:A	G:G	T:C	G:G	T:T	A:A	T:C	G:A	A:A	T:T	A:A	T:A	G:G	G:A	C:C	G:C	T:T	G:C	G:A	T:T
KP-2-11B	C:C	A:A	G:G	G:G	G:G	T:G	T:T	G:A	C:C	C:A	C:C	G:G	A:A	C:C	T:C	T:A	A:A	?	G:A	A:A	A:A	A:A	G:A	T:T	T:C	G:G	T:T	G:A	C:C	G:A	G:G	T:C	T:T	T:T	A:A	T:C	A:A	G:G	C:C	A:A	T:T	G:G	G:A	C:C	C:C	T:T	G:C	G:G	T:T
KP-2-11C	C:C	A:A	G:G	G:G	G:G	T:G	T:T	G:G	G:G	C:A	C:A	G:G	A:A	T:T	T:T	T:A	A:A	G:G	G:A	A:A	A:A	C:A	G:A	T:C	T:T	G:G	T:T	A:A	C:C	G:A	G:G	T:T	G:G	T:T	A:A	T:C	A:A	G:G	T:T	A:A	T:T	G:G	G:G	G:C	C:C	T:T	C:C	A:A	T:T
KP-2-11D	C:C	A:A	G:G	T:G	C:C	G:G	T:T	G:A	G:C	A:A	A:A	G:G	C:A	T:C	T:C	A:A	G:A	G:A	G:G	A:A	G:G	C:A	G:A	T:T	T:C	T:G	C:C	G:A	C:C	A:A	G:G	T:C	?	T:T	A:A	C:C	G:A	A:A	T:T	A:A	T:T	G:C	A:A	G:C	G:G	T:T	G:C	G:A	T:T
KP-2-11E	C:C	T:A	G:C	T:T	G:C	T:G	T:T	G:A	?	C:C	A:A	T:G	C:A	T:T	T:C	A:A	G:G	G:A	G:A	A:A	G:A	A:A	G:A	T:T	T:C	T:G	T:C	A:A	C:A	G:G	G:G	T:C	G:G	T:A	A:A	T:C	G:A	G:G	T:C	A:A	T:T	G:G	G:G	C:C	G:C	T:C	G:C	A:A	T:T
KP-2-11F	T:T	A:A	G:G	G:G	G:C	T:G	T:G	G:A	C:C	C:C	C:A	G:G	C:A	T:C	C:C	T:A	A:A	G:A	G:A	A:A	G:A	C:C	A:A	T:T	T:T	T:T	T:C	A:A	C:C	G:A	G:G	T:T	T:G	T:T	A:A	T:C	G:G	G:G	C:C	A:A	T:T	G:G	G:G	G:C	G:C	T:T	C:C	G:A	T:T
KP-2-11G	C:C	T:A	G:G	G:G	C:C	G:G	T:T	G:A	G:C	C:C	A:A	G:G	C:A	?	T:C	T:A	A:A	G:A	G:G	A:A	G:G	C:A	G:G	T:T	?	T:G	C:C	G:A	C:C	G:A	G:G	T:T	T:T	T:T	A:A	T:C	G:A	G:G	C:C	A:A	T:A	G:G	G:A	C:C	G:G	C:C	C:C	G:A	T:T
KP-2-11H	T:C	T:T	G:G	T:G	G:G	G:G	T:T	G:G	G:C	C:A	C:C	T:G	A:A	T:T	T:T	A:A	G:A	G:A	A:A	G:A	G:A	C:A	G:G	T:T	T:T	T:G	T:C	A:A	C:C	G:G	G:G	T:T	G:G	T:T	A:A	C:C	G:G	G:A	T:C	A:A	T:A	G:G	G:G	C:C	G:C	T:C	C:C	G:G	T:T
KP-2-12A	T:T	A:A	G:C	G:G	G:C	T:T	T:T	G:G	C:C	C:C	A:A	T:G	C:C	T:T	T:T	A:A	A:A	G:A	A:A	A:A	G:A	C:C	G:A	T:C	T:T	T:G	T:C	G:A	C:C	G:A	T:T	T:T	T:G	T:T	A:A	T:C	G:A	G:G	C:C	A:A	T:T	G:C	G:G	G:C	G:C	C:C	G:C	G:A	T:T
KP-2-12B	C:C	?	G:G	G:G	G:C	T:G	T:T	G:A	?	C:C	C:A	G:G	C:A	C:C	T:C	A:A	A:A	G:A	G:A	A:A	G:A	C:C	G:A	T:T	T:T	T:T	T:C	A:A	C:C	G:G	G:G	T:T	T:T	T:T	A:A	T:C	G:A	G:A	C:C	A:A	T:T	G:G	G:A	G:C	G:C	T:T	C:C	G:A	T:A
KP-2-12C	T:C	A:A	G:G	G:G	G:G	G:G	T:T	G:G	?	A:A	A:A	T:G	C:A	T:C	T:C	T:A	A:A	G:A	G:G	A:A	A:A	C:A	A:A	T:T	T:T	T:T	T:T	G:A	C:C	G:G	G:G	T:T	G:G	T:T	A:A	C:C	G:A	A:A	C:C	G:G	T:A	G:G	G:G	G:C	C:C	T:C	C:C	G:A	T:T
KP-2-12D	C:C	A:A	G:C	G:G	G:C	G:G	T:T	G:A	C:C	A:A	A:A	G:G	A:A	T:C	T:C	A:A	A:A	A:A	G:A	A:A	G:G	C:C	G:A	T:T	T:T	T:T	C:C	G:A	C:C	A:A	G:G	T:T	T:T	T:T	A:A	C:C	A:A	G:A	C:C	A:A	T:A	G:G	G:A	G:C	G:G	T:T	C:C	A:A	T:T
KP-2-12E	C:C	A:A	G:C	T:G	C:C	G:G	T:T	G:A	C:C	C:C	A:A	G:G	C:A	T:T	T:T	A:A	G:A	G:A	G:A	A:A	G:G	C:C	A:A	T:C	T:C	T:G	C:C	A:A	C:C	G:G	G:G	T:T	T:G	T:T	A:A	C:C	G:G	G:G	T:C	G:A	T:T	G:G	G:G	C:C	G:G	T:T	G:C	A:A	T:T
KP-2-12F	T:C	T:A	G:G	G:G	C:C	T:G	T:T	G:G	C:C	C:C	A:A	G:G	A:A	C:C	T:T	A:A	A:A	A:A	G:A	A:A	G:G	A:A	G:G	T:T	T:T	G:G	C:C	G:A	C:A	G:A	G:G	T:T	T:G	T:T	G:A	C:C	?	G:G	C:C	A:A	T:A	G:G	G:G	C:C	G:G	T:T	?	G:A	T:T
KP-2-12G	C:C	?	G:C	G:G	C:C	G:G	T:T	G:A	C:C	C:A	A:A	G:G	C:A	C:C	T:T	A:A	A:A	G:A	A:A	A:A	G:G	A:A	G:G	T:T	?	G:G	C:C	A:A	C:C	G:G	G:G	T:C	T:T	T:T	A:A	T:T	G:A	G:G	T:C	A:A	A:A	G:G	A:A	G:C	G:G	T:T	C:C	G:G	T:T
KP-3-1A	T:T	A:A	G:C	T:G	C:C	G:G	T:T	G:G	G:G	C:A	C:A	G:G	C:A	T:T	T:C	A:A	G:A	A:A	G:G	G:A	G:G	C:A	G:G	T:T	T:T	T:G	C:C	A:A	C:C	G:G	G:G	T:T	G:G	T:T	A:A	T:C	?	G:G	C:C	A:A	A:A	G:G	G:A	G:C	G:G	T:C	C:C	G:A	T:T
KP-3-1B	C:C	A:A	G:C	T:G	G:G	T:G	T:T	A:A	C:C	C:C	C:A	T:G	C:A	T:C	T:T	A:A	G:A	G:G	A:A	A:A	A:A	C:C	G:G	T:T	T:C	T:G	T:T	G:A	C:C	G:A	G:G	T:T	G:G	T:T	A:A	T:C	G:A	G:G	C:C	A:A	T:T	G:G	G:A	C:C	C:C	T:T	C:C	A:A	T:T
KP-3-1C	C:C	A:A	G:C	G:G	G:G	T:G	T:T	A:A	C:C	C:C	C:A	G:G	C:A	T:T	T:C	A:A	A:A	G:G	A:A	G:A	A:A	C:C	G:G	T:T	T:C	G:G	T:T	G:A	C:C	A:A	G:G	T:T	G:G	T:T	A:A	T:C	A:A	G:G	C:C	A:A	T:T	G:C	A:A	C:C	C:C	T:C	G:C	A:A	T:T
KP-3-1D	T:T	A:A	G:G	T:G	G:C	G:G	T:T	G:A	C:C	C:A	A:A	G:G	C:A	T:C	T:T	A:A	G:A	G:G	G:A	A:A	G:A	C:A	G:A	T:T	T:T	G:G	T:C	A:A	C:C	G:G	G:G	T:C	G:G	T:T	A:A	C:C	G:G	?	T:T	G:A	T:T	G:G	G:A	G:C	G:C	T:C	C:C	A:A	T:T
KP-3-1E	C:C	?	G:G	G:G	G:G	G:G	T:T	G:G	C:C	C:A	A:A	T:G	A:A	T:C	T:C	A:A	A:A	?	G:A	A:A	A:A	C:C	A:A	T:T	T:T	T:T	T:T	A:A	C:C	G:A	G:G	T:T	T:G	T:T	A:A	C:C	A:A	G:A	T:T	G:A	T:A	G:G	G:G	G:C	C:C	T:T	C:C	A:A	T:T
KP-3-1F	C:C	T:A	G:C	T:G	G:G	G:G	T:T	A:A	C:C	C:C	A:A	T:G	C:A	T:T	T:T	A:A	G:A	G:G	A:A	G:A	A:A	C:A	G:A	T:T	T:C	T:G	T:T	G:A	C:C	A:A	G:G	T:T	T:G	T:T	A:A	T:C	G:A	G:G	C:C	A:A	T:T	G:C	G:A	G:C	C:C	T:T	C:C	G:A	T:T
KP-3-1G	T:C	A:A	C:C	T:G	G:G	G:G	T:T	A:A	G:C	C:A	C:C	T:G	C:A	T:C	T:C	A:A	G:A	G:A	G:G	A:A	A:A	C:C	A:A	T:T	T:T	T:T	T:T	A:A	C:C	G:G	G:G	T:T	T:G	T:T	A:A	T:C	G:A	?	T:T	A:A	T:T	G:G	G:A	C:C	C:C	T:T	C:C	A:A	T:T
KP-3-1H	T:C	T:T	G:G	G:G	C:C	G:G	T:T	G:G	G:C	C:C	A:A	G:G	A:A	T:C	T:T	A:A	A:A	G:A	A:A	G:G	G:G	C:A	A:A	T:C	T:C	T:G	C:C	A:A	C:C	G:G	G:G	T:T	G:G	T:T	A:A	C:C	G:A	G:G	T:C	G:A	T:T	G:G	G:G	G:C	G:G	T:C	G:G	A:A	T:T
KP-3-2A	?	T:T	G:C	G:G	C:C	G:G	T:T	G:A	C:C	C:A	?	?	?	?	T:C	A:A	A:A	A:A	?	?	?	C:C	?	T:T	?	T:T	C:C	G:A	C:C	G:A	G:G	T:T	T:T	?	?	?	?	?	C:C	?	?	G:G	G:A	G:G	G:G	?	C:C	?	?
KP-3-2B	T:C	?	C:C	G:G	G:C	G:G	T:T	G:G	C:C	C:C	C:A	T:G	C:C	T:T	T:T	A:A	A:A	G:A	G:A	A:A	G:G	C:C	G:G	T:T	T:T	T:G	T:C	A:A	C:C	A:A	T:T	T:T	T:G	T:T	A:A	T:C	G:A	G:G	T:C	G:A	T:T	G:C	G:A	G:C	G:C	C:C	G:C	G:A	T:T
KP-3-2C	C:C	?	G:G	T:G	C:C	G:G	T:T	G:A	C:C	A:A	A:A	T:G	A:A	T:T	T:T	A:A	G:A	G:A	G:A	G:A	G:G	C:A	G:G	T:T	T:T	T:G	C:C	A:A	C:C	G:A	G:G	T:T	T:T	T:T	A:A	T:C	G:A	G:G	C:C	G:A	T:T	G:G	G:A	C:C	G:G	T:T	G:C	G:A	T:T
KP-3-2D	C:C	T:A	G:G	G:G	C:C	G:G	T:T	G:G	?	C:A	C:C	G:G	A:A	T:C	T:C	A:A	A:A	A:A	G:G	A:A	G:G	C:C	G:G	T:C	T:C	G:G	C:C	A:A	C:C	G:G	G:G	T:T	T:T	T:T	A:A	C:C	A:A	G:G	T:C	G:A	T:A	G:G	G:A	G:G	G:G	T:T	C:C	G:A	T:T
KP-3-2E	C:C	T:A	G:G	G:G	C:C	G:G	T:T	A:A	G:G	C:A	A:A	G:G	C:A	T:T	T:T	A:A	A:A	A:A	G:A	G:A	G:G	C:C	G:A	T:T	T:T	T:G	C:C	A:A	C:A	G:A	G:G	T:T	T:G	T:T	A:A	T:C	G:A	G:A	C:C	G:A	T:A	G:G	G:A	G:C	G:G	T:C	G:C	G:A	T:T
KP-3-2F	C:C	T:A	G:G	G:G	G:G	G:G	T:T	G:G	G:G	C:A	C:A	G:G	C:A	T:C	C:C	A:A	A:A	G:A	A:A	A:A	A:A	C:A	G:A	T:T	T:T	T:T	T:T	G:A	C:C	G:A	G:G	T:T	G:G	T:T	A:A	T:T	G:G	A:A	T:C	A:A	T:T	G:G	G:G	G:G	C:C	T:T	G:C	G:A	T:T
KP-3-2G	C:C	?	G:G	G:G	G:G	G:G	T:T	G:A	C:C	C:A	C:A	G:G	C:A	T:T	T:T	A:A	A:A	G:G	G:A	G:A	G:A	A:A	G:A	T:C	T:C	T:G	T:C	G:A	C:C	A:A	G:G	T:C	T:G	T:T	A:A	T:C	G:G	G:A	C:C	G:A	T:T	G:G	G:G	G:C	G:C	T:C	C:C	G:A	T:T
KP-3-2H	C:C	T:T	G:G	T:G	G:G	T:G	T:T	G:A	C:C	C:C	A:A	T:G	C:A	T:C	T:T	A:A	G:A	G:G	A:A	G:A	A:A	C:C	G:A	T:T	?	T:G	T:T	G:A	C:C	A:A	G:G	T:T	G:G	T:T	A:A	T:C	A:A	G:G	C:C	A:A	T:T	G:C	A:A	G:C	C:C	T:T	G:C	A:A	T:T
KP-3-3A	T:T	T:A	G:G	G:G	C:C	G:G	T:T	G:G	C:C	C:A	C:C	T:G	A:A	T:C	T:C	A:A	A:A	G:A	A:A	A:A	G:G	C:A	G:A	T:C	T:T	T:G	C:C	A:A	C:C	G:A	G:G	T:T	T:G	T:T	A:A	T:C	A:A	G:G	C:C	A:A	T:T	G:G	G:G	G:C	G:G	T:C	C:C	G:G	T:T
KP-3-3B	C:C	A:A	G:G	G:G	C:C	T:G	T:G	A:A	C:C	C:A	C:A	T:G	C:C	T:C	T:C	A:A	A:A	G:A	G:A	G:A	G:G	C:A	G:A	T:C	T:T	G:G	C:C	G:A	C:C	G:G	G:G	T:T	T:G	T:T	A:A	C:C	G:A	G:A	C:C	A:A	T:T	G:G	G:A	C:C	G:G	T:C	G:G	G:A	T:A
KP-3-3C	C:C	?	G:G	T:G	G:C	G:G	T:T	G:G	C:C	C:A	A:A	T:G	A:A	T:C	T:C	A:A	G:A	?	G:A	A:A	G:A	C:C	G:A	T:T	T:T	T:T	T:C	G:A	C:C	G:G	G:G	T:T	T:T	T:T	A:A	T:T	G:A	?	T:C	A:A	T:T	G:G	G:G	C:C	G:C	T:C	G:C	A:A	T:T
KP-3-3D	C:C	?	G:C	T:G	G:G	T:G	T:T	A:A	C:C	C:C	C:A	T:G	C:A	T:C	T:C	A:A	G:A	G:G	A:A	A:A	A:A	C:A	G:G	T:T	T:C	T:T	T:T	G:A	C:C	G:G	G:G	T:T	G:G	T:T	A:A	T:C	G:A	G:G	C:C	A:A	T:T	G:C	G:A	G:C	C:C	T:C	G:C	G:A	T:T
KP-3-3E	C:C	?	G:C	G:G	G:C	G:G	T:T	G:G	C:C	C:C	A:A	G:G	A:A	?	T:C	A:A	A:A	G:A	G:A	G:A	G:A	A:A	A:A	T:T	T:T	T:G	T:C	A:A	C:C	G:G	G:G	T:T	?	T:T	A:A	C:C	A:A	?	T:T	G:G	?	G:G	A:A	G:G	G:C	T:C	G:G	G:G	T:T
KP-3-3F	C:C	T:A	G:C	G:G	G:C	G:G	T:T	G:G	G:G	C:A	C:A	G:G	A:A	T:T	C:C	A:A	A:A	?	A:A	G:A	G:A	C:C	G:A	T:T	T:T	G:G	T:C	A:A	C:C	A:A	G:G	T:C	G:G	T:A	A:A	C:C	G:G	?	C:C	G:G	T:T	G:G	G:A	C:C	G:C	T:T	C:C	A:A	T:T
KP-3-3G	C:C	?	G:C	G:G	C:C	T:G	T:T	G:A	C:C	C:C	A:A	T:G	A:A	T:T	T:T	A:A	A:A	A:A	G:G	G:A	G:G	C:A	G:A	T:T	T:C	T:G	C:C	A:A	C:C	G:G	G:G	T:C	T:T	T:T	A:A	C:C	G:A	G:G	C:C	G:A	T:A	G:G	A:A	C:C	G:G	T:T	G:G	G:A	T:T
KP-3-3H	T:C	T:A	G:G	G:G	C:C	T:G	T:G	G:A	C:C	C:C	C:C	T:G	C:C	T:T	T:T	A:A	A:A	G:A	G:A	?	?	A:A	A:A	T:T	T:T	G:G	C:C	A:A	C:C	?	G:G	T:C	T:G	T:T	A:A	C:C	?	G:G	C:C	G:A	T:T	G:G	G:A	C:C	G:G	T:C	G:G	G:G	T:T
KP-3-4A	T:C	T:A	C:C	T:G	G:C	G:G	T:T	G:A	G:G	C:A	A:A	G:G	A:A	T:T	T:C	A:A	G:A	G:G	G:G	G:A	G:A	C:A	G:G	T:T	T:T	T:T	T:C	A:A	C:C	G:G	G:G	T:T	G:G	T:T	A:A	T:C	G:A	G:G	T:T	A:A	T:T	G:G	G:A	C:C	G:C	T:T	C:C	G:A	T:T
KP-3-4B	C:C	T:A	G:C	G:G	C:C	G:G	T:T	G:A	C:C	C:A	A:A	G:G	A:A	T:T	T:C	A:A	A:A	G:A	G:G	A:A	G:G	C:C	A:A	T:C	T:C	T:G	C:C	A:A	C:C	G:G	G:G	T:T	T:G	T:T	A:A	C:C	A:A	G:G	C:C	A:A	T:T	G:G	G:G	C:C	G:G	T:T	G:C	A:A	T:T
KP-3-4C	C:C	A:A	G:C	T:G	G:G	G:G	T:T	G:A	C:C	C:C	C:A	G:G	C:C	T:T	T:C	T:A	G:A	G:A	A:A	A:A	A:A	C:A	A:A	T:C	T:T	T:G	T:T	G:A	C:C	A:A	G:G	T:C	T:T	T:A	A:A	T:T	G:A	G:A	T:C	G:A	T:T	G:G	G:G	G:G	C:C	T:T	G:G	?	T:T
KP-3-4D	T:T	T:A	G:G	G:G	G:C	G:G	T:T	A:A	?	C:C	C:A	G:G	C:A	T:C	T:T	A:A	A:A	G:A	G:G	A:A	G:A	C:C	G:A	T:T	T:C	G:G	T:C	A:A	C:C	G:G	G:G	T:T	G:G	T:T	A:A	T:C	G:G	G:G	C:C	A:A	T:T	G:G	G:G	G:C	G:C	C:C	C:C	A:A	T:T
KP-3-4E	C:C	T:A	G:G	G:G	G:C	G:G	T:T	G:A	?	C:C	A:A	G:G	C:A	T:T	T:T	A:A	A:A	G:A	A:A	G:G	G:A	C:C	G:A	T:T	T:C	G:G	T:C	A:A	C:C	G:G	G:G	T:C	T:T	T:T	A:A	T:C	A:A	G:G	C:C	A:A	T:T	G:G	G:G	G:C	G:C	T:C	G:C	G:A	T:T
KP-3-4F	C:C	?	G:C	G:G	G:G	G:G	T:T	G:A	C:C	C:C	A:A	G:G	C:A	?	T:T	A:A	A:A	G:G	G:A	G:A	G:A	A:A	A:A	T:T	T:T	T:G	T:C	A:A	C:C	G:A	G:G	T:C	T:T	T:T	A:A	T:T	A:A	G:A	T:C	A:A	T:T	G:C	G:G	G:C	G:C	T:C	G:C	G:A	T:T
KP-3-4G	C:C	T:A	G:C	T:G	G:C	G:G	T:T	G:A	?	C:A	A:A	G:G	A:A	T:C	T:T	A:A	G:A	G:A	G:G	A:A	G:A	C:A	G:A	T:T	T:T	G:G	T:C	A:A	C:C	A:A	G:G	T:T	T:G	T:T	A:A	T:C	A:A	G:G	T:C	A:A	T:T	G:G	G:A	G:C	G:C	T:T	C:C	G:A	T:T
KP-3-4H	T:C	T:A	G:G	G:G	G:C	G:G	T:T	G:A	C:C	C:A	A:A	G:G	C:C	?	T:T	A:A	A:A	G:A	G:A	?	G:A	A:A	A:A	T:T	T:T	T:G	T:C	G:A	C:C	G:A	G:G	T:C	G:G	T:T	A:A	C:C	?	G:G	T:C	A:A	T:T	G:C	A:A	C:C	G:C	T:T	G:G	G:A	T:T
KP-3-5A	C:C	?	G:G	G:G	G:C	G:G	T:T	G:G	G:G	C:A	A:A	G:G	A:A	T:T	T:C	A:A	A:A	G:G	G:A	G:A	?	C:A	A:A	T:T	T:T	T:G	T:C	A:A	C:C	?	G:G	T:T	T:G	T:T	A:A	C:C	G:A	?	C:C	G:A	T:T	G:G	G:A	C:C	?	T:C	C:C	?	T:T
N2P-4-1F	C:C	T:A	G:C	G:G	C:C	G:G	T:G	G:A	C:C	A:A	A:A	G:G	A:A	T:C	T:C	A:A	A:A	G:A	G:A	A:A	G:G	C:A	G:A	T:T	T:T	G:G	C:C	A:A	C:C	G:A	G:G	T:T	T:G	T:T	A:A	T:C	G:A	?	C:C	A:A	T:T	G:G	G:G	C:C	G:G	T:T	G:C	G:A	T:T
N2P-4-1G	T:C	?	G:C	G:G	G:C	G:G	T:T	G:G	G:C	C:C	C:A	T:G	A:A	T:T	T:T	A:A	A:A	G:A	G:G	A:A	G:A	C:C	G:G	T:T	T:T	G:G	T:C	G:A	C:C	G:G	G:G	T:C	T:T	T:A	A:A	T:C	A:A	G:A	T:C	G:A	T:T	G:G	G:G	G:G	G:C	T:C	C:C	A:A	T:T
N2P-4-1H	C:C	?	G:C	G:G	G:C	G:G	T:T	G:A	C:C	C:A	C:A	G:G	C:A	T:T	T:C	T:A	A:A	G:A	G:G	G:A	G:A	A:A	A:A	T:T	C:C	G:G	T:C	G:G	C:C	G:A	G:G	T:T	T:T	T:T	A:A	T:C	G:A	G:A	C:C	?	T:T	G:G	G:G	C:C	G:C	T:T	C:C	G:G	T:T
N2P-4-2A	T:C	?	G:G	G:G	C:C	G:G	T:T	G:A	C:C	C:A	C:C	T:G	A:A	T:T	T:T	A:A	A:A	G:A	G:G	A:A	G:G	C:C	G:A	T:T	T:T	T:T	C:C	G:A	C:C	G:A	G:G	T:C	T:T	T:A	A:A	T:C	G:A	G:A	C:C	G:A	T:T	G:G	G:G	C:C	G:G	C:C	G:C	A:A	T:T
N2P-4-2B	C:C	A:A	G:G	T:G	G:C	G:G	T:G	G:A	C:C	C:C	C:A	T:G	C:A	T:C	T:C	A:A	G:A	G:A	A:A	G:A	G:A	C:C	G:A	T:T	T:T	T:G	T:C	A:A	C:C	G:G	G:G	T:T	T:T	T:T	A:A	C:C	A:A	G:G	T:C	A:A	T:A	G:C	G:G	C:C	G:C	T:T	G:C	G:A	T:T
N2P-4-2C	T:C	T:T	G:C	T:G	C:C	G:G	T:T	G:A	?	C:C	C:C	T:G	C:A	T:T	T:T	A:A	G:A	G:A	G:A	A:A	G:G	C:C	A:A	T:C	T:C	G:G	C:C	G:A	C:C	G:G	G:G	T:T	T:T	T:T	A:A	T:C	A:A	G:G	T:C	A:A	A:A	G:G	G:A	G:C	G:G	T:T	G:C	G:A	T:A
N2P-4-2D	C:C	?	G:C	T:G	G:C	G:G	T:T	G:G	G:C	C:A	C:A	T:G	?	?	T:T	A:A	G:A	G:A	A:A	G:A	G:A	C:A	A:A	T:T	T:T	T:G	T:C	A:A	C:C	G:G	G:G	T:T	T:T	T:T	A:A	T:C	A:A	G:G	C:C	A:A	T:T	G:G	G:A	G:C	G:C	T:T	C:C	G:A	T:T
N2P-4-2E	?	?	G:G	G:G	G:C	G:G	T:G	G:A	?	C:C	?	?	?	?	T:T	A:A	A:A	G:G	?	?	?	C:A	?	?	?	T:T	T:C	A:A	C:C	A:A	G:G	T:T	T:T	?	?	?	?	A:A	?	?	?	G:G	G:A	G:G	G:C	T:T	?	?	?
N2P-4-2F	C:C	T:A	G:G	G:G	G:C	T:G	T:T	G:G	C:C	C:A	C:A	G:G	C:A	T:T	T:T	A:A	A:A	A:A	G:A	A:A	G:A	C:C	A:A	T:T	T:T	T:G	T:C	A:A	C:C	G:A	G:G	T:T	T:T	T:T	A:A	T:C	G:A	?	C:C	A:A	T:T	G:G	G:A	G:C	G:C	T:T	G:C	A:A	T:T
N2P-4-2G	T:C	?	G:C	G:G	G:C	G:G	T:T	G:G	C:C	C:A	A:A	G:G	C:A	T:C	T:T	A:A	A:A	G:A	A:A	A:A	G:A	C:A	G:A	T:T	T:T	T:G	T:C	G:A	C:C	G:A	T:T	T:T	G:G	T:T	A:A	T:C	G:G	G:A	C:C	A:A	T:T	G:G	G:A	C:C	G:C	T:T	C:C	A:A	T:T
N2P-4-2H	C:C	T:A	G:C	G:G	C:C	G:G	T:T	G:G	C:C	C:C	A:A	T:G	A:A	T:T	T:T	A:A	A:A	G:A	A:A	G:G	G:G	C:A	G:A	T:T	T:T	T:G	C:C	A:A	C:C	A:A	G:G	T:T	G:G	T:T	A:A	T:C	G:A	G:A	T:C	A:A	T:T	G:C	G:G	C:C	G:G	T:T	G:C	G:A	T:T
N2P-4-3A	T:C	?	C:C	T:G	C:C	G:G	T:T	G:G	C:C	C:A	A:A	G:G	C:A	C:C	T:C	A:A	G:A	G:A	A:A	A:A	G:G	C:A	G:A	T:T	T:T	T:G	C:C	A:A	C:C	G:A	T:T	T:T	G:G	T:T	A:A	T:C	G:A	A:A	T:C	G:A	T:T	G:G	G:G	G:C	G:G	T:T	C:C	A:A	T:T
N2P-4-3B	C:C	T:T	G:G	T:G	C:C	G:G	T:T	G:A	G:G	C:C	C:C	T:G	C:A	T:T	T:T	A:A	G:A	G:G	G:A	A:A	G:G	C:C	G:A	C:C	T:C	T:G	C:C	A:A	C:C	G:G	G:G	T:T	G:G	T:T	A:A	T:C	A:A	G:G	T:C	G:G	T:T	G:G	G:G	C:C	G:G	T:T	G:C	A:A	T:T
N2P-4-3C	?	A:A	C:C	G:G	G:C	G:G	T:T	G:G	C:C	C:A	A:A	G:G	C:A	?	T:C	A:A	A:A	?	A:A	A:A	?	C:A	A:A	T:T	T:T	T:G	T:C	A:A	C:C	G:G	T:T	T:T	T:T	T:T	?	C:C	?	G:G	C:C	A:A	T:T	G:G	A:A	G:C	G:C	T:T	G:C	G:A	T:T
N2P-4-3D	C:C	?	G:C	G:G	C:C	G:G	T:T	G:A	C:C	C:C	C:C	G:G	C:C	T:T	T:T	A:A	A:A	G:G	G:A	G:A	G:G	A:A	G:A	T:T	T:T	T:G	C:C	A:A	C:C	G:G	G:G	T:T	G:G	T:T	A:A	C:C	G:G	G:G	C:C	G:A	T:T	G:C	G:A	C:C	G:G	T:T	C:C	G:A	T:T
N2P-4-3E	C:C	T:T	G:C	T:T	G:C	G:G	T:T	G:G	C:C	A:A	A:A	T:G	C:C	T:C	T:C	A:A	G:G	G:G	A:A	A:A	G:A	C:C	G:A	T:T	T:C	G:G	T:C	A:A	C:C	G:G	G:G	T:T	G:G	T:T	A:A	C:C	A:A	G:G	T:C	G:A	T:A	G:C	G:G	C:C	G:C	T:T	G:C	A:A	T:T
N2P-4-3F	C:C	?	G:C	T:G	G:C	G:G	T:T	G:G	C:C	C:A	C:A	T:G	C:C	T:T	T:C	A:A	G:A	G:G	A:A	A:A	G:A	C:A	G:A	T:T	T:T	T:G	C:C	A:A	C:C	G:A	G:G	T:T	T:G	T:T	A:A	T:C	A:A	G:A	C:C	?	T:T	G:G	G:G	G:G	G:G	T:T	C:C	G:A	T:T
N2P-4-3G	T:C	T:A	G:G	G:G	G:C	G:G	T:T	G:A	?	A:A	C:A	G:G	C:A	T:T	T:T	A:A	A:A	G:A	G:A	A:A	G:A	C:C	A:A	T:T	T:T	T:G	T:C	G:A	C:C	G:G	T:T	T:T	T:T	T:T	A:A	C:C	?	?	T:C	A:A	T:T	G:G	G:A	C:C	G:C	T:T	G:C	A:A	T:T
N2P-4-3H	C:C	?	G:C	T:G	C:C	G:G	T:G	A:A	C:C	C:A	A:A	T:G	A:A	T:T	T:C	A:A	G:A	G:G	G:A	A:A	G:G	C:A	G:G	T:T	T:T	T:G	C:C	G:A	C:C	G:A	G:G	T:T	G:G	T:T	A:A	T:C	A:A	G:A	C:C	?	T:A	G:G	G:A	G:C	G:G	T:C	G:C	A:A	T:T
N2P-4-4A	?	?	C:C	T:T	G:C	T:G	T:T	G:A	C:C	C:A	A:A	?	A:A	?	T:T	A:A	G:G	G:A	G:A	G:A	?	C:A	G:A	T:T	T:T	T:G	T:C	A:A	C:C	G:A	G:G	T:T	T:G	T:T	A:A	C:C	?	A:A	C:C	G:G	T:T	G:G	G:A	G:C	G:C	T:T	G:C	G:A	T:T
N2P-4-4B	T:C	A:A	G:C	G:G	G:G	G:G	T:T	G:G	C:C	C:C	C:C	T:G	A:A	T:T	T:C	A:A	A:A	G:A	A:A	A:A	A:A	C:C	G:G	T:T	T:C	T:T	T:T	A:A	C:C	G:G	G:G	T:T	T:T	T:T	A:A	C:C	G:A	G:A	C:C	G:A	T:T	G:G	G:G	C:C	C:C	T:T	G:C	A:A	T:T
N2P-4-4C	T:C	A:A	G:C	G:G	G:G	G:G	T:T	G:G	C:C	C:C	A:A	G:G	C:A	T:C	T:T	A:A	A:A	A:A	G:A	A:A	A:A	C:A	G:G	T:T	T:T	T:G	T:T	G:A	C:C	G:A	G:G	T:T	T:T	T:T	A:A	T:T	G:A	?	C:C	A:A	T:T	G:C	G:G	C:C	C:C	T:T	C:C	G:A	T:T
N2P-4-4D	T:C	T:T	G:C	G:G	C:C	T:G	T:T	A:A	C:C	C:C	C:A	T:G	A:A	T:T	C:C	A:A	A:A	A:A	A:A	G:A	G:G	C:A	A:A	T:C	T:C	T:T	C:C	A:A	C:C	G:G	G:G	T:T	G:G	T:T	A:A	T:C	G:A	?	C:C	G:A	T:T	G:G	G:A	G:C	G:G	T:T	G:G	G:A	T:T
N2P-4-4E	C:C	T:A	G:C	G:G	G:C	G:G	T:G	A:A	C:C	C:A	C:A	G:G	?	T:T	T:C	A:A	A:A	A:A	A:A	A:A	G:A	A:A	A:A	T:T	T:T	T:T	T:T	G:A	C:C	G:G	G:G	T:T	T:T	T:T	A:A	T:T	G:A	G:A	C:C	A:A	T:T	G:C	G:A	G:C	C:C	T:T	G:C	G:G	T:T
N2P-4-4F	T:C	?	C:C	G:G	G:C	G:G	T:T	G:A	C:C	C:A	C:C	G:G	A:A	T:C	T:C	A:A	A:A	G:G	A:A	A:A	G:A	C:C	?	T:T	T:T	T:G	T:C	A:A	C:C	G:G	G:G	T:T	G:G	T:T	A:A	C:C	G:A	G:A	C:C	A:A	T:T	G:G	G:G	C:C	G:C	T:T	C:C	G:A	T:T
N2P-4-4G	T:C	T:A	G:G	G:G	C:C	T:G	T:T	G:G	C:C	C:C	C:A	T:G	C:A	T:C	T:T	A:A	A:A	G:G	G:G	G:A	G:G	C:A	G:G	T:T	T:C	T:G	C:C	G:A	C:C	G:A	G:G	T:T	T:T	T:T	A:A	T:C	G:A	G:G	T:C	A:A	T:T	G:G	G:A	G:C	G:G	T:C	C:C	G:A	T:T
N2P-4-4H	T:C	?	G:C	G:G	C:C	T:G	T:T	G:G	C:C	C:C	C:A	T:G	C:A	T:T	T:C	T:A	A:A	G:G	G:G	A:A	G:G	C:A	G:G	T:T	T:T	G:G	C:C	G:A	C:C	G:A	G:G	T:T	T:T	T:T	A:A	T:C	G:G	G:A	C:C	G:A	T:T	G:G	G:A	G:C	G:G	T:T	G:C	G:A	T:T
N2P-4-5A	T:C	?	G:G	T:G	C:C	G:G	T:T	G:G	C:C	C:A	C:A	T:G	C:C	T:C	T:C	A:A	G:A	G:A	A:A	G:A	G:G	C:C	G:A	T:T	T:T	T:G	C:C	G:A	C:C	G:A	G:G	T:T	T:G	T:T	A:A	T:T	G:A	G:G	C:C	G:A	T:A	G:G	G:G	C:C	G:G	T:T	G:C	A:A	T:T
N2P-4-5B	C:C	?	G:C	G:G	C:C	G:G	T:T	G:A	C:C	C:C	C:C	T:G	A:A	T:T	T:T	A:A	G:A	G:G	G:G	A:A	G:G	C:C	A:A	T:T	T:T	G:G	C:C	A:A	C:C	G:G	G:G	T:T	T:T	T:T	A:A	T:C	G:A	G:A	C:C	A:A	T:T	G:G	G:G	G:C	G:G	T:T	G:C	A:A	T:T
N2P-4-5C	C:C	?	G:C	G:G	C:C	T:G	T:T	G:G	C:C	C:A	C:A	G:G	A:A	T:C	T:T	A:A	A:A	G:A	A:A	A:A	G:G	C:C	G:G	T:T	T:T	G:G	C:C	G:A	C:C	G:G	G:G	T:T	T:T	T:T	A:A	T:C	G:A	G:G	C:C	A:A	T:A	G:G	G:G	G:C	G:G	T:T	G:G	A:A	T:T
N2P-4-5D	T:C	?	G:G	G:G	G:C	G:G	T:T	G:G	C:C	C:C	C:A	G:G	C:A	T:C	T:T	A:A	A:A	G:A	A:A	A:A	G:A	C:C	A:A	T:T	T:C	T:G	T:C	A:A	C:C	G:A	G:G	T:T	T:T	T:T	A:A	T:C	G:A	G:G	C:C	G:A	T:T	G:G	G:G	G:C	G:C	T:C	C:C	A:A	T:T
N2P-4-5E	T:C	T:A	C:C	G:G	G:C	G:G	T:T	G:G	C:C	C:A	A:A	T:G	C:C	T:T	C:C	A:A	A:A	G:G	A:A	G:A	G:A	C:C	G:G	T:T	T:T	G:G	T:C	A:A	C:C	G:A	G:G	T:T	T:T	T:T	A:A	T:C	G:G	G:A	C:C	A:A	?	G:G	G:G	G:G	G:C	T:T	G:C	A:A	T:T
N2P-4-5F	T:C	?	G:C	G:G	G:G	G:G	T:T	G:G	C:C	A:A	A:A	G:G	C:A	T:T	T:C	A:A	A:A	G:A	A:A	G:A	A:A	C:A	A:A	T:T	T:T	T:G	T:T	A:A	C:C	G:A	G:G	T:T	G:G	T:T	A:A	C:C	G:G	A:A	T:C	A:A	T:T	G:G	G:G	C:C	C:C	T:T	C:C	A:A	T:T
N2P-4-5G	T:T	?	G:C	G:G	G:C	G:G	T:G	G:A	?	A:A	A:A	T:G	C:A	T:C	T:C	A:A	A:A	G:G	A:A	A:A	G:A	C:A	G:G	T:T	T:T	T:T	T:C	G:A	C:C	G:A	G:G	T:T	T:T	T:T	A:A	T:C	A:A	A:A	C:C	A:A	?	G:G	G:G	G:C	G:C	T:T	G:C	G:G	T:T
N2P-4-5H	T:C	?	G:G	G:G	C:C	G:G	T:G	G:G	C:C	C:A	C:A	T:G	A:A	T:C	T:T	A:A	A:A	G:G	G:G	A:A	G:G	C:A	A:A	T:T	T:T	T:T	C:C	A:A	C:C	G:G	G:G	T:T	T:G	T:T	A:A	C:C	G:G	A:A	C:C	G:A	T:T	G:C	G:A	G:C	G:G	T:T	C:C	G:A	T:T
N2P-4-6A	C:C	T:A	G:G	G:G	G:C	G:G	T:T	G:G	C:C	C:A	C:A	T:T	C:A	T:T	T:T	A:A	A:A	G:A	G:A	A:A	G:A	C:C	G:A	T:T	T:T	T:G	T:C	G:A	C:C	G:A	T:T	C:C	G:G	A:A	A:A	T:C	A:A	G:G	C:C	A:A	T:A	G:G	G:G	G:C	G:C	T:T	G:G	G:A	T:T
NLP-4-10A	C:C	A:A	G:G	G:G	G:C	G:G	T:T	G:A	C:C	A:A	C:A	G:G	C:A	C:C	T:T	A:A	A:A	G:A	G:G	G:A	G:A	C:A	G:A	C:C	T:T	G:G	T:C	A:A	C:C	A:A	G:G	T:C	T:G	T:T	A:A	C:C	G:A	G:A	T:C	G:G	T:T	G:C	G:A	G:C	G:C	C:C	C:C	G:A	T:T
NLP-4-10B	T:C	?	G:G	T:G	G:C	T:G	T:T	G:A	C:C	A:A	A:A	T:G	A:A	T:C	T:T	A:A	G:A	A:A	A:A	G:A	G:A	A:A	G:A	T:T	T:T	T:G	T:C	A:A	C:C	G:A	T:T	T:C	G:G	T:T	A:A	C:C	G:A	?	C:C	A:A	T:T	G:G	A:A	C:C	G:C	T:T	C:C	G:A	T:T
NLP-4-10C	C:C	A:A	G:G	T:G	G:C	T:G	T:T	A:A	G:C	C:A	C:C	T:T	A:A	T:C	T:C	T:T	G:A	G:G	G:A	A:A	G:A	C:A	G:A	T:T	C:C	G:G	T:C	A:A	C:C	G:A	T:T	C:C	G:G	A:A	A:A	T:T	G:A	G:A	T:C	G:A	T:T	G:C	G:G	G:C	G:C	T:T	C:C	G:A	T:T
NLP-4-10D	T:C	?	G:G	G:G	G:C	T:G	T:T	G:G	?	A:A	C:A	G:G	C:A	T:C	T:C	T:A	A:A	G:A	G:A	G:A	G:G	C:A	G:A	T:T	T:T	T:G	C:C	G:A	C:C	G:A	G:G	T:T	T:T	T:T	A:A	T:T	G:A	G:G	T:C	G:A	T:T	G:G	G:G	C:C	G:G	T:T	G:G	G:A	T:T
NLP-4-10E	C:C	A:A	G:C	T:G	C:C	T:G	T:T	G:G	G:C	C:A	A:A	T:T	A:A	T:C	T:T	T:A	G:A	A:A	G:A	G:G	G:A	C:C	G:G	T:C	T:C	T:G	T:C	A:A	C:A	A:A	G:G	T:C	T:T	T:T	G:A	T:C	G:A	G:A	T:T	G:A	A:A	G:G	G:G	C:C	G:C	T:T	C:C	A:A	T:T
NLP-4-10F	C:C	?	G:G	T:T	G:G	G:G	T:T	G:A	G:C	C:A	C:C	G:G	?	T:C	T:C	T:T	G:G	G:A	G:A	A:A	G:A	C:A	G:A	T:C	T:T	T:T	T:C	A:A	C:C	A:A	G:G	T:T	T:T	T:T	A:A	C:C	G:A	A:A	C:C	A:A	T:A	G:G	G:A	C:C	G:C	T:C	G:G	G:A	T:T
NLP-4-10G	T:C	A:A	G:G	G:G	G:G	G:G	T:T	G:A	G:G	A:A	C:C	G:G	C:A	T:C	T:C	A:A	A:A	A:A	G:A	A:A	G:A	C:A	G:G	T:C	T:T	G:G	T:C	G:G	C:C	A:A	G:G	T:T	T:T	T:T	A:A	T:C	A:A	G:G	T:C	A:A	T:T	G:G	G:G	G:C	G:C	C:C	C:C	G:A	T:T
NLP-4-10H	C:C	?	G:G	G:G	G:C	G:G	T:T	G:G	G:G	A:A	A:A	G:G	A:A	C:C	C:C	A:A	A:A	G:A	G:A	G:A	G:A	C:C	A:A	C:C	T:C	G:G	T:C	G:A	C:C	G:A	G:G	T:T	G:G	T:T	A:A	T:C	G:A	G:A	T:C	?	T:A	G:G	G:G	C:C	G:C	C:C	G:G	A:A	T:T
NLP-4-11A	C:C	A:A	G:G	G:G	G:G	T:G	T:T	G:G	C:C	C:A	A:A	T:T	C:C	T:C	C:C	A:A	A:A	G:A	A:A	A:A	A:A	A:A	A:A	T:T	T:C	T:T	T:T	G:A	C:C	A:A	G:G	T:T	T:T	T:T	A:A	T:C	G:G	G:A	T:C	G:A	T:T	G:G	G:G	C:C	C:C	T:T	C:C	G:A	T:T
NLP-4-11B	C:C	T:T	G:G	T:G	C:C	G:G	T:T	G:A	C:C	C:C	A:A	G:G	C:C	T:T	T:T	T:A	G:A	A:A	G:G	G:A	G:G	A:A	A:A	T:T	T:C	T:G	C:C	A:A	C:C	G:G	G:G	T:C	T:T	T:A	A:A	T:T	A:A	G:A	C:C	G:A	T:A	G:C	G:G	C:C	G:G	T:C	G:C	G:A	T:T
NLP-4-11C	C:C	A:A	G:C	G:G	C:C	G:G	T:G	G:G	G:G	C:A	C:A	G:G	C:A	T:T	T:T	T:A	A:A	A:A	A:A	G:A	G:G	C:A	G:A	T:T	T:C	T:G	C:C	G:A	C:C	G:A	T:T	T:T	T:T	T:T	A:A	C:C	A:A	G:A	T:C	A:A	T:A	G:G	G:A	G:C	G:G	T:C	G:C	A:A	T:T
NLP-4-11D	C:C	T:A	G:C	T:G	C:C	G:G	T:T	G:G	C:C	A:A	C:A	T:G	C:A	T:C	C:C	A:A	G:A	G:G	G:A	G:A	G:G	A:A	A:A	T:C	T:C	G:G	C:C	G:A	C:A	G:A	T:T	T:C	T:G	T:A	A:A	T:C	A:A	G:A	T:C	G:A	A:A	G:G	G:G	G:C	G:G	T:T	C:C	G:A	T:T
NLP-4-11E	C:C	A:A	G:G	T:G	G:C	G:G	T:T	G:G	G:C	C:C	A:A	T:G	C:A	T:T	C:C	T:A	G:A	G:A	G:A	G:G	G:A	C:C	A:A	T:C	T:C	T:G	T:C	A:A	C:C	A:A	G:G	T:T	?	T:T	A:A	T:C	G:G	G:G	C:C	A:A	T:A	G:C	G:A	C:C	G:C	T:C	G:G	A:A	T:T
NLP-4-11F	T:C	A:A	G:G	T:T	G:C	T:G	T:T	A:A	?	C:C	C:A	G:G	C:C	T:T	T:T	A:A	G:G	G:A	G:A	G:G	G:G	C:A	G:A	T:C	T:C	T:G	C:C	G:A	C:C	A:A	T:T	T:T	T:T	T:T	A:A	C:C	G:G	G:G	T:C	G:G	T:T	G:G	G:G	C:C	G:G	T:T	G:C	G:A	T:A
NLP-4-11G	C:C	A:A	G:C	T:G	G:C	T:T	T:T	G:G	C:C	A:A	C:A	T:T	C:A	T:C	T:C	A:A	G:A	G:G	A:A	G:A	G:A	C:C	G:A	T:T	T:T	G:G	T:C	G:A	C:C	G:A	G:G	T:T	T:T	T:T	A:A	T:C	A:A	G:G	T:C	G:A	T:T	G:C	G:G	C:C	G:C	T:T	C:C	A:A	T:T
NLP-4-11H	T:C	?	G:G	G:G	G:G	T:G	T:T	G:G	C:C	C:C	A:A	G:G	C:C	C:C	T:T	T:A	A:A	G:A	G:A	A:A	G:A	C:C	G:A	T:C	T:T	T:G	T:C	A:A	C:C	A:A	G:G	T:T	T:T	T:T	A:A	C:C	G:G	A:A	C:C	A:A	T:A	G:C	G:G	G:C	G:C	T:C	C:C	A:A	T:T
NLP-4-12A	C:C	T:A	G:C	G:G	G:C	G:G	T:G	G:A	C:C	C:A	C:A	T:G	C:A	T:T	T:T	T:T	A:A	G:G	G:A	A:A	G:A	C:A	G:A	T:C	T:T	G:G	T:C	A:A	C:C	A:A	T:T	T:T	T:T	T:T	A:A	T:C	G:A	G:A	C:C	G:A	T:A	G:C	G:A	C:C	G:C	C:C	G:C	A:A	T:T
NLP-4-12B	C:C	A:A	G:G	G:G	C:C	G:G	T:T	G:G	C:C	C:A	C:A	G:G	C:A	T:T	T:T	T:A	A:A	A:A	G:A	G:A	G:G	A:A	G:A	T:T	T:T	G:G	C:C	A:A	C:C	G:A	G:G	T:T	T:T	T:T	A:A	T:C	G:A	G:A	T:C	A:A	T:T	G:G	G:A	C:C	G:G	T:T	G:C	A:A	T:A
NLP-4-12C	C:C	T:A	G:C	G:G	C:C	G:G	T:T	G:A	C:C	A:A	A:A	G:G	C:C	C:C	T:C	T:A	A:A	A:A	G:A	G:G	G:G	C:C	A:A	C:C	T:C	T:G	C:C	G:G	C:C	G:A	G:G	T:T	G:G	T:T	A:A	T:C	A:A	G:G	C:C	G:A	T:A	G:G	A:A	C:C	G:G	T:C	G:C	A:A	T:T
NLP-4-12D	C:C	A:A	G:G	T:T	G:G	T:G	T:T	A:A	?	C:A	A:A	T:G	C:C	T:C	T:T	A:A	G:G	G:A	G:G	G:A	G:A	C:A	G:A	T:C	T:C	T:G	T:C	A:A	C:C	A:A	G:G	T:T	T:T	T:T	A:A	C:C	G:G	G:G	C:C	G:G	T:A	G:G	G:G	G:C	G:C	T:T	G:C	A:A	T:A
NLP-4-12E	C:C	A:A	G:C	T:G	G:G	G:G	T:T	G:G	C:C	C:A	A:A	G:G	C:A	T:C	T:C	T:T	G:A	A:A	A:A	G:A	A:A	C:C	A:A	C:C	T:C	T:G	T:T	G:A	C:C	A:A	G:G	T:T	?	T:T	A:A	T:C	G:G	G:A	C:C	A:A	T:T	G:G	G:G	C:C	C:C	T:C	G:C	A:A	T:T
NLP-4-12F	C:C	?	G:G	G:G	G:C	G:G	T:T	G:A	C:C	A:A	C:C	T:G	A:A	T:C	T:C	A:A	A:A	A:A	A:A	A:A	G:A	C:A	G:A	T:T	C:C	T:G	T:C	G:A	C:C	A:A	G:G	T:T	T:T	T:T	A:A	T:C	A:A	G:G	T:T	G:A	T:T	G:C	G:G	C:C	G:C	T:T	C:C	G:A	T:T
NLP-4-12G	C:C	A:A	G:C	G:G	C:C	G:G	T:T	A:A	G:G	C:C	C:A	T:G	C:A	T:C	T:T	T:A	A:A	A:A	G:A	G:A	G:G	C:A	G:A	T:C	C:C	T:T	C:C	G:A	C:C	A:A	T:T	T:T	T:T	T:T	A:A	C:C	G:A	G:A	T:C	A:A	T:A	G:G	G:A	C:C	G:G	C:C	C:C	A:A	T:T
NLP-4-6B	T:T	T:A	G:C	T:G	G:C	G:G	T:G	G:A	C:C	C:A	A:A	G:G	C:A	T:T	T:T	T:A	G:A	G:G	G:G	A:A	G:G	C:A	G:A	T:T	T:C	T:T	C:C	A:A	C:C	G:A	G:G	T:T	T:G	T:T	A:A	T:C	A:A	G:A	T:C	G:A	T:T	G:G	G:A	G:G	G:G	T:C	G:G	G:A	T:T
NLP-4-6C	C:C	T:A	G:G	T:G	G:C	T:G	T:T	A:A	G:G	C:A	A:A	G:G	C:A	T:T	C:C	T:A	G:A	A:A	G:A	G:G	G:G	C:A	G:A	T:T	T:C	T:T	C:C	A:A	C:C	G:G	G:G	T:T	G:G	T:T	A:A	T:C	A:A	G:A	C:C	A:A	T:T	G:G	G:G	C:C	G:G	T:C	G:G	G:A	T:T
NLP-4-6D	T:C	T:A	G:C	G:G	C:C	G:G	T:T	G:G	C:C	C:C	A:A	G:G	C:A	T:T	T:T	A:A	A:A	G:G	A:A	G:A	G:G	C:A	G:A	T:T	T:C	G:G	C:C	G:G	C:C	G:G	T:T	C:C	T:T	A:A	A:A	T:C	A:A	G:G	T:C	G:A	T:A	G:C	G:A	G:C	G:G	C:C	C:C	G:A	T:T
NLP-4-6E	T:C	T:A	G:G	G:G	C:C	G:G	T:T	G:G	G:G	C:A	C:C	T:G	C:C	T:T	T:T	A:A	?	A:A	A:A	A:A	G:G	C:A	A:A	T:T	T:T	T:G	C:C	A:A	C:A	A:A	G:G	T:T	G:G	T:T	A:A	C:C	G:A	G:G	C:C	G:A	T:T	G:G	G:A	G:C	G:G	T:C	G:C	G:A	T:T
NLP-4-6F	?	T:A	G:G	T:G	G:C	G:G	T:T	G:G	G:C	A:A	C:A	G:G	C:C	?	T:T	T:A	G:A	A:A	G:G	?	?	A:A	A:A	T:C	T:T	T:G	T:C	A:A	C:C	G:A	G:G	T:T	T:T	T:T	?	?	?	G:A	T:C	G:A	T:T	G:G	G:G	C:C	G:C	T:C	G:C	G:A	T:T
NLP-4-6G	C:C	?	G:C	T:T	G:G	G:G	T:T	G:G	C:C	C:C	A:A	G:G	C:C	T:C	T:C	A:A	G:G	G:G	G:A	G:A	G:A	C:A	G:A	T:T	T:T	G:G	T:C	A:A	C:C	G:G	T:T	T:T	T:T	T:T	A:A	C:C	A:A	G:A	C:C	G:A	T:A	G:G	G:G	G:G	G:C	T:T	G:C	G:A	T:T
NLP-4-6H	C:C	?	G:C	G:G	G:C	T:G	T:G	G:A	G:G	A:A	A:A	T:G	A:A	T:T	T:T	A:A	A:A	A:A	G:A	G:A	G:A	C:C	G:A	T:C	T:C	T:G	T:C	A:A	C:C	A:A	G:G	T:C	T:G	T:A	A:A	T:C	A:A	G:G	C:C	?	A:A	G:G	G:G	C:C	G:C	T:C	C:C	A:A	T:T
NLP-4-7A	T:C	A:A	G:G	G:G	G:C	G:G	T:T	G:G	G:C	C:C	A:A	G:G	C:A	T:T	T:C	A:A	A:A	G:G	G:A	G:A	G:A	A:A	A:A	T:C	T:C	G:G	T:C	G:A	C:C	A:A	G:G	T:C	G:G	T:T	A:A	T:C	G:A	G:A	T:C	G:A	T:T	G:C	G:G	G:C	G:C	T:C	G:C	A:A	T:T
NLP-4-7B	?	?	G:G	T:G	G:C	T:G	T:T	G:A	G:G	A:A	?	?	?	?	T:C	T:A	G:A	G:G	G:G	A:A	?	C:A	A:A	T:T	?	T:G	T:C	A:A	C:C	G:A	T:T	C:C	T:T	A:A	?	?	A:A	?	?	G:G	?	G:G	G:G	G:C	G:C	T:T	?	?	?
NLP-4-7C	T:T	A:A	G:G	G:G	C:C	G:G	T:T	G:G	C:C	C:A	A:A	G:G	C:C	T:C	T:C	A:A	A:A	G:A	A:A	A:A	G:G	C:A	A:A	T:C	T:C	G:G	C:C	G:A	C:C	G:A	G:G	T:T	T:T	T:T	A:A	C:C	A:A	G:A	T:T	A:A	T:T	G:G	A:A	G:C	G:G	T:T	G:C	G:A	T:T
NLP-4-7D	T:C	T:A	G:G	T:G	G:C	G:G	T:T	G:G	C:C	C:A	C:A	G:G	A:A	T:C	T:T	A:A	G:A	A:A	A:A	A:A	G:A	C:C	G:A	T:T	C:C	G:G	T:C	A:A	C:C	G:A	G:G	T:T	T:G	T:T	A:A	T:C	A:A	G:A	C:C	G:G	T:T	G:G	G:G	C:C	G:C	T:T	G:C	A:A	T:T
NLP-4-7E	C:C	?	G:C	T:G	C:C	G:G	T:T	G:G	G:C	C:C	A:A	T:G	A:A	T:C	T:T	T:A	G:A	A:A	A:A	G:A	G:G	C:C	G:G	T:T	T:C	T:G	C:C	A:A	C:C	G:A	G:G	C:C	G:G	A:A	A:A	T:C	G:A	G:G	C:C	G:A	A:A	G:G	G:G	G:C	G:G	T:C	C:C	G:A	T:T
NLP-4-7F	C:C	?	G:C	T:G	C:C	G:G	T:G	G:G	C:C	A:A	A:A	G:G	C:A	T:C	T:T	T:T	G:A	A:A	A:A	G:A	G:G	A:A	G:A	T:C	T:T	T:T	C:C	G:A	C:C	G:A	G:G	T:C	T:G	T:T	A:A	T:T	A:A	A:A	T:C	A:A	T:A	G:G	G:G	G:C	G:G	T:T	G:C	G:G	T:A
NLP-4-7G	C:C	T:A	G:C	T:T	G:C	G:G	T:G	G:A	G:G	C:A	A:A	T:G	C:A	T:C	T:C	T:T	G:G	G:A	G:A	G:G	A:A	A:A	A:A	T:T	T:C	G:G	T:T	A:A	C:C	G:A	G:G	T:C	T:G	T:A	A:A	C:C	A:A	G:G	T:C	G:G	T:A	G:G	G:A	G:C	C:C	T:C	C:C	G:G	T:T
NLP-4-7H	T:C	T:A	G:C	T:T	G:C	?	T:T	G:G	C:C	A:A	C:A	G:G	C:C	C:C	T:T	T:A	G:G	A:A	G:A	A:A	G:A	C:A	G:A	T:C	T:T	G:G	T:C	G:A	C:C	G:A	G:G	T:C	T:G	T:A	A:A	C:C	G:G	G:G	C:C	?	T:A	G:C	G:A	C:C	G:C	T:T	G:C	G:A	T:T
NLP-4-8A	C:C	A:A	G:C	T:T	G:G	G:G	T:T	G:G	?	C:C	C:A	G:G	C:A	T:C	T:T	T:A	G:G	A:A	G:A	G:G	G:A	C:A	A:A	T:T	C:C	T:T	T:C	A:A	C:C	G:A	G:G	T:C	G:G	T:A	A:A	C:C	A:A	G:G	T:C	G:A	T:A	G:G	?	C:C	G:C	T:T	G:C	G:A	T:T
NLP-4-8B	C:C	A:A	G:C	T:G	G:G	T:G	T:T	G:G	C:C	C:C	C:A	T:G	A:A	C:C	C:C	A:A	G:A	G:A	G:A	A:A	A:A	C:A	G:A	T:T	T:T	T:T	T:T	A:A	C:C	G:A	G:G	T:T	T:G	T:T	A:A	T:C	A:A	G:G	T:C	A:A	T:T	G:G	G:G	C:C	C:C	T:C	G:C	A:A	T:T
NLP-4-8C	T:C	T:A	C:C	G:G	G:C	G:G	T:T	G:G	G:G	C:C	C:A	G:G	A:A	C:C	T:T	T:A	A:A	A:A	G:A	G:A	G:G	C:A	A:A	T:C	C:C	G:G	C:C	A:A	C:C	A:A	G:G	T:T	T:T	T:T	A:A	C:C	A:A	G:A	C:C	G:A	T:A	G:G	G:G	C:C	G:G	C:C	C:C	G:A	T:T
NLP-4-8D	T:C	?	G:G	T:T	G:C	T:T	T:G	G:G	C:C	A:A	A:A	G:G	C:A	T:C	T:T	T:A	G:G	G:A	G:A	G:G	G:A	A:A	G:A	T:C	T:T	T:G	T:C	G:A	C:C	G:A	G:G	T:T	T:T	T:T	A:A	T:C	G:A	G:A	C:C	G:G	T:A	G:G	G:A	C:C	G:C	T:C	G:C	G:G	T:T
NLP-4-8E	C:C	T:A	G:C	G:G	C:C	G:G	T:T	G:A	G:C	C:C	A:A	G:G	A:A	T:C	T:T	A:A	A:A	G:A	G:A	A:A	G:G	C:A	G:A	T:C	T:C	T:G	C:C	G:A	C:C	G:G	G:G	T:T	T:G	T:T	A:A	T:T	G:A	G:G	T:C	A:A	T:A	G:G	G:A	C:C	G:G	C:C	C:C	A:A	T:T
NLP-4-8F	C:C	?	G:C	T:G	G:G	G:G	T:T	G:G	C:C	A:A	C:A	G:G	C:A	T:C	T:T	T:A	G:A	A:A	G:A	G:A	A:A	C:A	G:G	T:C	T:C	G:G	T:T	A:A	C:C	G:A	G:G	T:T	T:G	T:T	A:A	C:C	A:A	G:A	C:C	G:A	T:T	G:C	G:A	C:C	C:C	T:T	C:C	A:A	T:T
NLP-4-8G	T:T	T:A	G:C	T:G	G:C	G:G	T:T	G:A	C:C	C:C	C:A	T:G	A:A	T:T	T:T	A:A	G:A	G:G	G:A	G:A	G:A	A:A	G:A	C:C	T:C	T:T	T:C	G:A	C:A	G:A	G:G	T:C	G:G	T:T	G:G	T:C	A:A	A:A	T:C	A:A	T:A	G:G	G:G	G:C	G:C	T:T	G:C	G:A	T:T
NLP-4-8H	T:T	A:A	G:G	T:G	G:C	G:G	T:T	G:A	C:C	A:A	C:C	T:T	A:A	T:C	T:C	T:A	G:A	G:A	A:A	A:A	G:A	A:A	G:G	T:T	T:T	T:G	T:C	A:A	C:C	G:A	G:G	T:T	T:T	T:T	A:A	C:C	A:A	G:G	T:C	G:A	A:A	G:G	A:A	G:C	G:C	T:T	C:C	G:G	T:T
NLP-4-9A	C:C	A:A	G:C	G:G	C:C	G:G	T:T	G:A	C:C	C:A	C:A	T:G	C:A	C:C	T:T	T:A	A:A	A:A	G:G	G:A	G:G	C:C	G:G	T:C	T:T	G:G	C:C	G:A	C:C	G:A	G:G	T:C	T:G	T:T	A:A	T:T	G:A	G:G	C:C	G:A	T:T	G:G	G:A	G:C	G:G	T:T	C:C	A:A	T:T
NLP-4-9B	T:C	?	G:C	G:G	C:C	T:G	T:T	G:A	C:C	C:A	C:A	G:G	C:A	T:C	T:T	A:A	A:A	G:A	G:A	G:A	G:G	C:A	A:A	T:C	T:C	T:G	C:C	A:A	C:C	G:A	G:G	T:C	T:G	T:A	A:A	C:C	G:A	G:G	T:C	G:A	T:T	G:C	G:G	G:C	G:G	T:C	G:C	A:A	T:T
NLP-4-9D	C:C	?	G:C	T:G	G:C	G:G	T:T	G:A	C:C	C:C	A:A	T:G	C:A	T:C	C:C	A:A	G:A	A:A	G:A	G:A	G:A	C:A	G:A	T:C	T:T	T:G	T:C	A:A	C:C	G:A	G:G	T:C	G:G	T:T	A:A	T:C	G:A	?	C:C	G:A	T:T	G:G	A:A	G:C	G:C	T:C	G:C	G:A	T:T
NLP-4-9E	T:C	?	G:G	G:G	C:C	G:G	T:T	G:G	G:G	A:A	C:A	T:G	?	T:T	T:C	T:A	A:A	G:A	G:G	G:A	G:G	A:A	G:A	T:T	T:T	G:G	C:C	G:A	C:C	G:A	G:G	T:C	G:G	T:A	A:A	C:C	G:A	G:G	T:C	A:A	T:A	G:G	G:G	G:C	G:G	T:T	?	G:G	T:T
NLP-4-9F	T:C	?	G:C	G:G	G:G	G:G	T:T	G:G	G:C	C:A	C:A	T:T	C:C	T:T	T:C	T:A	A:A	A:A	G:A	A:A	G:A	C:A	A:A	T:C	T:T	T:G	T:C	G:A	C:C	A:A	G:G	T:T	T:G	T:T	A:A	T:C	A:A	G:G	T:C	G:A	T:T	G:G	G:A	G:C	G:C	T:T	C:C	G:G	T:T
NLP-4-9G	C:C	?	G:C	G:G	G:C	G:G	T:T	G:G	C:C	C:C	A:A	G:G	C:A	T:T	T:T	T:A	A:A	G:A	G:A	A:A	G:G	C:A	G:A	T:T	T:T	T:G	C:C	A:A	C:C	G:G	G:G	T:T	T:G	T:T	A:A	C:C	G:A	G:G	T:T	A:A	T:A	G:G	A:A	C:C	G:G	T:T	G:C	G:A	T:T
NLP-4-9H	C:C	T:A	G:G	T:T	G:C	G:G	T:T	G:A	C:C	A:A	C:A	T:T	C:A	T:T	T:C	T:T	G:G	G:A	A:A	G:A	G:A	C:A	G:A	T:T	T:T	G:G	T:C	G:A	C:C	G:A	G:G	T:T	G:G	T:T	A:A	T:T	G:A	G:G	T:C	A:A	A:A	C:C	G:G	G:C	G:C	T:T	C:C	G:G	T:T
NP-1-1A	C:C	?	C:C	G:G	C:C	G:G	T:T	G:A	?	C:A	A:A	G:G	A:A	T:C	T:T	A:A	A:A	A:A	G:A	A:A	G:G	C:A	G:A	T:C	T:T	T:G	C:C	A:A	C:C	G:A	G:G	T:T	T:T	T:T	A:A	C:C	A:A	A:A	C:C	A:A	T:T	G:G	G:G	C:C	G:G	T:T	G:G	G:A	T:T
NP-1-1B	C:C	A:A	G:C	G:G	G:C	T:G	T:T	G:G	C:C	C:A	A:A	T:G	C:A	T:C	T:C	A:A	A:A	G:G	G:A	A:A	G:A	C:C	A:A	T:C	T:T	G:G	T:C	A:A	C:C	G:G	G:G	T:T	T:T	T:T	A:A	C:C	A:A	G:G	C:C	A:A	T:T	G:G	G:G	C:C	G:C	T:C	C:C	A:A	T:T
NP-1-1C	?	?	C:C	G:G	C:C	G:G	T:T	G:A	C:C	C:A	?	?	?	C:C	T:T	A:A	A:A	G:A	?	?	?	C:A	?	?	?	T:G	C:C	G:A	C:C	G:A	G:G	T:T	T:G	?	?	?	?	?	?	?	?	G:C	G:G	C:C	G:G	?	?	?	?
NP-1-1D	C:C	?	G:C	G:G	G:C	G:G	T:G	G:G	C:C	C:A	C:A	G:G	A:A	T:T	T:T	A:A	A:A	A:A	A:A	A:A	G:A	C:C	A:A	T:T	T:T	G:G	T:C	A:A	C:C	G:G	G:G	T:T	G:G	T:T	A:A	C:C	G:A	A:A	C:C	A:A	T:T	G:C	G:G	C:C	G:C	T:T	G:C	A:A	T:T
NP-1-1E	T:C	?	G:C	G:G	G:C	G:G	T:T	G:G	C:C	C:A	C:C	G:G	C:A	T:C	T:T	A:A	A:A	A:A	A:A	G:A	G:A	C:A	A:A	T:C	T:T	G:G	T:C	A:A	C:C	G:G	G:G	T:T	T:G	T:T	A:A	C:C	?	A:A	C:C	A:A	T:A	G:C	G:A	G:C	G:C	T:C	C:C	A:A	T:T
NP-1-1F	T:C	T:A	G:G	G:G	G:C	G:G	T:T	G:G	C:C	A:A	A:A	G:G	C:A	T:T	T:T	T:A	A:A	G:A	G:A	A:A	G:A	A:A	G:A	T:T	T:T	T:T	T:C	G:A	C:C	G:G	G:G	T:T	T:G	T:T	A:A	T:T	G:G	G:G	T:C	G:A	T:A	G:G	G:G	G:C	G:C	T:T	C:C	G:G	T:T
NP-1-1G	T:C	A:A	G:C	T:G	G:C	G:G	T:T	G:A	C:C	A:A	A:A	T:G	C:A	T:T	T:C	A:A	G:A	G:A	G:A	A:A	G:A	C:A	G:A	T:T	T:T	T:G	T:C	A:A	C:C	G:G	G:G	T:T	T:T	T:T	A:A	C:C	G:A	G:G	C:C	A:A	T:T	G:G	G:G	G:C	G:C	T:T	G:C	G:A	T:T
NP-1-1H	C:C	T:A	G:C	T:G	G:C	G:G	T:T	A:A	C:C	A:A	C:C	T:G	A:A	T:C	T:T	A:A	G:A	A:A	G:A	G:A	G:A	C:C	G:A	T:T	T:T	T:T	T:C	A:A	C:C	G:G	G:G	T:T	T:G	T:T	A:A	C:C	G:A	G:G	C:C	G:A	T:A	G:G	A:A	G:G	G:C	T:T	C:C	A:A	T:T
NP-1-2A	?	T:A	G:G	G:G	C:C	G:G	T:T	G:G	C:C	C:A	C:A	T:G	C:A	T:C	T:T	A:A	A:A	A:A	?	?	?	C:A	A:A	T:T	T:T	T:G	T:C	A:A	C:C	G:A	G:G	T:T	T:T	T:T	?	?	?	G:G	T:C	A:A	T:T	G:G	G:G	G:C	G:G	T:C	G:C	G:A	T:A
NP-1-2B	C:C	?	G:C	T:G	C:C	G:G	T:T	G:G	C:C	C:C	A:A	G:G	A:A	T:C	T:T	A:A	G:A	G:G	G:A	G:A	G:G	C:A	G:A	T:T	T:T	G:G	C:C	A:A	C:C	A:A	G:G	T:T	T:T	T:T	A:A	T:C	G:A	G:G	C:C	A:A	T:T	G:G	G:G	G:G	G:G	T:C	C:C	G:A	T:T
NP-1-2C	C:C	T:A	G:C	G:G	C:C	G:G	T:T	G:G	G:G	C:C	A:A	T:G	C:A	T:T	T:C	A:A	A:A	G:G	G:A	A:A	G:G	C:A	G:G	T:T	T:T	T:T	C:C	A:A	C:C	G:A	G:G	T:T	G:G	T:T	A:A	C:C	G:A	G:G	C:C	A:A	T:T	G:C	G:A	G:C	G:G	T:T	C:C	G:A	T:T
NP-1-2D	T:C	T:A	G:G	T:G	C:C	G:G	T:T	G:G	C:C	C:A	C:C	T:G	C:A	C:C	T:T	A:A	G:A	G:G	A:A	G:A	G:G	C:C	G:A	T:C	T:T	T:G	C:C	A:A	C:C	G:A	G:G	T:T	T:G	T:T	A:A	C:C	G:G	?	C:C	A:A	T:T	G:G	G:G	G:C	G:G	T:T	G:C	A:A	T:T
NP-1-2E	T:C	A:A	G:C	G:G	C:C	G:G	T:T	G:G	C:C	C:A	C:C	G:G	C:C	T:C	T:T	A:A	A:A	G:G	G:A	A:A	G:G	A:A	G:A	T:T	T:T	T:G	C:C	A:A	C:C	G:A	G:G	T:T	T:T	T:T	A:A	T:C	A:A	G:A	C:C	G:A	T:A	G:G	G:A	G:G	G:G	T:T	C:C	A:A	T:T
NP-1-2F	T:C	A:A	G:G	?	C:C	G:G	T:T	G:G	?	C:C	C:A	G:G	C:A	T:C	T:T	A:A	A:A	G:A	G:A	A:A	G:G	C:C	A:A	T:T	T:T	T:G	C:C	A:A	C:C	G:A	G:G	T:T	T:G	T:T	A:A	T:C	G:A	?	C:C	A:A	T:A	G:G	G:G	C:C	G:G	T:T	G:C	A:A	T:T
NP-1-2G	T:T	T:T	G:G	T:G	C:C	G:G	T:T	G:A	C:C	C:A	A:A	G:G	C:A	C:C	T:T	A:A	G:A	G:A	G:G	G:G	G:G	A:A	G:A	T:T	?	T:G	?	A:A	C:C	?	G:G	T:T	T:T	T:T	A:A	C:C	A:A	?	C:C	?	T:T	G:G	A:A	G:C	G:G	T:T	G:G	G:G	T:T
NP-1-2H	C:C	T:A	G:C	G:G	G:C	G:G	T:T	G:G	C:C	C:A	C:A	G:G	C:C	T:T	T:T	A:A	A:A	G:G	G:A	G:A	G:A	C:A	G:A	T:T	T:T	T:G	T:C	G:G	C:C	A:A	G:G	T:T	T:G	T:T	A:A	T:C	G:A	A:A	C:C	A:A	T:T	G:G	G:G	C:C	G:C	T:T	G:C	A:A	T:T
NP-1-3A	C:C	?	C:C	G:G	C:C	G:G	T:T	G:G	?	C:A	C:A	G:G	C:A	T:C	T:C	A:A	A:A	G:A	A:A	A:A	G:G	C:C	G:A	T:T	T:T	T:T	C:C	A:A	C:C	G:A	G:G	T:T	T:G	T:T	A:A	T:C	A:A	G:A	C:C	A:A	T:T	G:G	A:A	C:C	G:G	T:T	G:C	A:A	T:T
NP-1-3B	C:C	T:A	G:C	T:G	G:G	G:G	T:T	G:G	C:C	C:A	C:A	G:G	C:A	T:C	T:C	A:A	G:A	G:A	G:A	A:A	A:A	C:A	G:A	T:C	T:T	G:G	T:T	A:A	C:C	?	G:G	T:T	T:G	T:T	A:A	T:T	G:G	G:A	C:C	A:A	T:T	G:G	G:A	C:C	C:C	T:T	G:C	G:A	T:T
NP-1-3C	C:C	T:A	G:C	G:G	C:C	G:G	T:T	G:G	C:C	C:C	A:A	G:G	A:A	T:T	T:T	A:A	A:A	G:A	A:A	A:A	G:G	A:A	G:A	T:T	T:C	T:G	C:C	A:A	C:C	G:A	G:G	T:T	G:G	T:T	A:A	T:C	?	G:G	C:C	A:A	T:T	G:G	G:G	G:C	G:G	T:T	G:C	G:G	T:T
NP-1-3D	C:C	A:A	G:G	G:G	C:C	G:G	T:T	G:G	?	C:C	C:A	G:G	C:C	T:T	T:T	A:A	A:A	G:G	G:A	A:A	G:G	C:A	G:A	T:C	T:T	T:G	C:C	G:A	C:C	G:A	G:G	T:T	T:T	T:T	A:A	T:T	G:A	G:G	C:C	A:A	T:A	G:G	G:G	G:C	G:G	T:T	G:C	G:A	T:T
NP-1-3E	T:T	A:A	G:C	G:G	C:C	G:G	T:T	G:G	?	C:C	C:C	G:G	C:A	T:T	T:C	A:A	A:A	G:A	G:A	A:A	G:G	C:C	G:A	T:T	T:T	T:G	C:C	A:A	C:C	G:A	G:G	T:T	T:T	T:T	A:A	T:C	A:A	?	T:C	A:A	?	G:G	G:G	C:C	G:G	T:T	G:C	A:A	T:T
NP-1-3F	C:C	?	G:C	G:G	G:G	G:G	T:T	G:A	C:C	A:A	C:A	T:G	C:A	T:T	T:C	A:A	A:A	G:A	G:A	A:A	A:A	C:A	G:A	T:T	T:T	T:G	T:T	A:A	C:C	G:A	G:G	T:C	T:T	T:A	A:A	T:C	A:A	G:G	C:C	G:A	T:T	G:C	G:A	G:G	C:C	T:C	C:C	G:A	T:T
NP-1-3G	C:C	T:A	G:C	G:G	G:G	T:G	T:T	G:G	C:C	C:A	A:A	G:G	C:A	T:C	C:C	A:A	A:A	G:G	G:A	A:A	A:A	C:C	A:A	T:C	T:T	G:G	T:T	A:A	C:C	G:G	G:G	T:C	T:T	T:T	A:A	C:C	A:A	G:A	C:C	A:A	T:T	G:G	G:G	C:C	C:C	T:T	C:C	A:A	T:T
NP-1-3H	C:C	T:A	G:C	G:G	G:C	G:G	T:T	G:A	C:C	C:A	C:A	G:G	C:A	T:T	T:T	A:A	A:A	G:G	A:A	G:G	G:A	C:A	G:A	T:T	T:T	G:G	T:C	G:G	C:C	A:A	G:G	T:T	T:T	T:T	A:A	T:C	G:A	G:A	C:C	A:A	T:T	G:G	G:G	G:C	G:C	T:T	G:C	G:A	T:T
NP-1-4A	?	T:T	C:C	T:G	G:C	G:G	T:T	G:A	C:C	C:A	?	?	?	?	T:T	A:A	G:A	G:G	?	?	A:A	?	?	?	?	T:T	T:C	A:A	C:C	G:G	G:G	T:T	T:G	T:T	?	?	?	?	C:C	?	?	G:G	G:G	G:C	G:C	?	G:G	?	?
NP-1-4B	T:C	?	G:G	G:G	G:C	T:G	T:T	G:A	C:C	A:A	A:A	?	C:A	T:T	T:T	A:A	A:A	G:A	A:A	A:A	?	C:A	A:A	T:C	T:C	G:G	?	A:A	C:C	?	G:G	T:T	T:G	T:T	A:A	C:C	A:A	?	C:C	G:G	?	G:G	G:A	C:C	G:C	T:T	G:C	?	T:A
NP-1-4C	C:C	?	G:C	G:G	C:C	G:G	T:T	G:A	C:C	C:C	C:A	G:G	A:A	C:C	T:T	A:A	A:A	G:A	G:A	A:A	G:G	C:C	G:G	T:T	T:T	T:G	C:C	A:A	C:C	G:A	G:G	T:T	T:G	T:T	A:A	C:C	A:A	A:A	C:C	A:A	T:T	G:C	G:A	C:C	G:G	T:T	G:C	A:A	T:T
NP-1-4D	T:C	?	C:C	T:G	G:C	G:G	T:T	G:G	?	C:A	C:A	?	C:A	T:T	T:C	A:A	G:A	G:A	G:A	G:A	G:A	C:A	G:A	T:T	T:T	T:T	T:C	G:A	C:C	G:G	G:G	T:T	T:G	T:T	A:A	C:C	G:G	?	C:C	?	T:T	G:G	G:G	C:C	G:C	T:T	C:C	?	T:T
[truncated: 74 more columns]
